# Supplementary material
Source: PubMed Central journal article supplement (PMC6613304)
Supplement: jamapsychiatry-76-1026-s001.pdf [file jamapsychiatry-76-1026-s001.pdf]

## Supplementary Online Content

Periyasamy S, John S, Padmavati R, et al. Association of schizophrenia risk with disordered niacin metabolism in an Indian genome-wide association study. *JAMA Psychiatry*. Published online July 3, 2019. doi: 10.1001/jamapsychiatry.2019.1335

**eMethods.** Data Collection and Analysis

**eResults.** Findings

**eFigure 1.** MDS Analysis Using 1000g SAS Population

**eFigure 2.** MDS Analysis Using 1000g SAS Populations and Our Indian Data Set

**eFigure 3.** MDS Analysis Using 1000g Super Populations

**eFigure 4.** SNP Heritability

**eFigure 5.** Q-Q Plot for Indian Meta-analysis

**eFigure 6.** Q-Q Plot for Indian Batch-Based Meta-analysis

**eFigure 7.** Regional Plot of Indian Chromosome 8q24.3 Locus (100-Kb Window) in PGC2 Data Set

**eFigure 8.** Manhattan Plot for PGC2-Indian Meta-analysis Using Metasoft-RE2C

**eFigure 9.** Regional Plot of Chromosome 8q24.3 Locus (100-Kb Window) in Cross Population Meta-analysis Results With SAS LD

**eFigure 10.** Regional Plot of Chromosome 8q24.3 Locus (100Kb window) in Cross Population Meta-analysis Results With EUR LD

**eFigure 11.** Genomic Profile Risk (PRS) Scoring

**eFigure 12.** Fine Mapping of Indian Top Locus

**eFigure 13.** Summary of the eQTL Results of *NAPRT1* in GTEx Heat Map

**eFigure 14.** Lead SNP, rs10866912, Is Associated (eQTL) With Brain Expression of *NAPRT1*

**eFigure 15.** Spatiotemporal Brain Expression Profiling of Genes in Top Locus

**eFigure 16.** Worldwide Pattern of Allele Frequencies for Indian Top SNP (rs10866912)

**eFigure 17.** Natural Selection Analyses Between South Asian and European Populations

**eFigure 18.** Manhattan Plot for Gene-Based Association Using MAGMA Version 1.06

**eFigure 19.** Network Connectivity Results for Indian Data Set Using MAGNUM

**eFigure 20.** Regional Plot of Indian SNP Data Set at PGC2 Top Locus (Chromosome 6p22:28303247-287712247; GRCh37/hg19 Build)

**eFigure 21.** Regional Plot of Top Replicated PGC2 Locus (Chromosome 2q32.3:193848340-194028340; GRCh37/hg19 Build) in Indian SNP Data Set

**eTable 1.** Indian Clinical Data

**eTable 2.** Clinical Characteristics

**eTable 3.** Symptoms and Treatment

**eTable 4.** Forward and Reverse Primer Sequences for DRE-*NAPRT1* mRNA

**eTable 5.** Study Population Haplotypes Present in Our Top Locus

**eTable 6.** Imputation Batch-Based Meta-analysis for Top Indian Locus

**eTable 7.** Transethnic Meta-analysis Results for Indian Top Locus With PGC2 Using Metasoft-RE2C

**eTable 8.** Transethnic Meta-analysis Results for 108 PGC2 Significant Regions Using Metasoft-RE2C

**eTable 9.** Risk Profile Scoring—Sign Test  $P$ -values for SNPs ( $P_T < .05$ ) Sharing the Same Direction of Effects

**eTable 10.** BRAINEAC *cis*-eQTL Results for the Top SNP and Genes in Indian Top Locus (100-Kb Window)

**eTable 11.** SMR Results Using the Brain-eMeta eQTL Data Set for Our Top SNP, rs10866912

**eTable 12.** Indian Replication Results for PGC2 Top Loci (96/108)

**eReferences**

This supplementary material has been provided by the authors to give readers additional information about their work.

## eMethods. Data Collection and Analysis

### Study Sample

All participants gave written informed consent, and the study was approved by relevant institutional ethics committees at each participating institution.

Individuals and families were ascertained via The Schizophrenia Research Foundation, Chennai (SCARF) Medical Records, hospital wards and outpatient clinics, and clinical networks primarily in Chennai, and most recently extending to Tiruchirappalli, Coimbatore, Erode and Hyderabad.

- (a) **Family sample:** The recruitment and diagnostic ascertainment of this sample have been previously described.<sup>1,2</sup> Briefly, recruitment was coordinated by the Schizophrenia Research Foundation (SCARF), Chennai, India. Within Tamil ancestry (defined linguistically and geographically), there was a primary focus on the Brahmin caste (Tamil, and others). Cases and families (Affected Sibling Pair, Trio) were exhaustively recruited from this caste, and then from other geographically proximate castes including Mudaliars and Dalits. Recruitment was conducted via SCARF medical records, inpatient unit, community mental health services, and outpatient clinics, together with a well-established recruitment network of clinicians (at hospitals, clinics in both public and private sectors), who had been previously involved in other SCARF research studies. These facilities included the Voluntary Health Services, Ramachandra Medical College and Hospital, and the Sundaram Medical Foundation.
- (b) **Case-control samples:** The recruitment and diagnostic ascertainment of the cases was identical to the family sample; the controls were assessed using a very similar questionnaire to that used for the healthy individuals within the family sample.
- (c) **Diagnostic Ascertainment:** Once informed consent was obtained and an individual was included in the study, diagnostic interviews were conducted using the Diagnostic Interview for Genetic Studies (DIGS). The research psychiatrists working on the study were able to administer this instrument in Tamil, where necessary, having previously organised its translation, with appropriate checking using standard back translation procedures. The Family Interview for Genetic Studies (FIGS) was also completed.
- (d) **Inclusion/Exclusion Criteria:** (i) **Inclusion Criteria for cases.** All participants had to be capable of giving signed, informed consent for interview and blood sample collection. Participants had to be over 18 years old at interview. Affected subjects were defined as those whose DSM-IV diagnosis is schizophrenia or schizo-affective disorder based on DIGS, medical records and FIGS sources of information. Control subjects were defined as individuals with no personal or family history (to two degrees) of psychotic disorder, based on FIGS interview. To avoid north-south geographical impact on allele frequency variation, we included only individuals (cases and controls) whose families originated in southern India, based on available interview information.  
(ii) **Exclusion Criteria for Individuals.** Subjects unable to give informed consent to all aspects of the study were excluded, as were those whose psychosis was judged to be secondary to substance use or a known neurological disorder such as epilepsy, based on the consensus diagnostic procedure. Subjects with severe mental retardation (MR) were also excluded, while those with mild MR (IQ>55 or based on clinical and educational history) were included. Subjects with more than 'occasional use' or 'previous use' of alcohol or cannabis (no other illicit drugs) were also excluded.  
(iii) **Inclusion Criteria for controls.** Based on selected recruiting strategies, individuals from the cases' defined geographic region were approached for participation. The FIGS interview plus an additional interview developed for this study, defined "unaffected" status and caste membership.
- (e) **Best Estimate Diagnosis:** In addition to the FIGS and DIGS interviews, comprehensive narrative reports of all historical and interview material were prepared for diagnostic review. Each case was independently reviewed by two experienced research psychiatrists (RP, ST, RT). Any outstanding questions about the case were then resolved (e.g. by the collection of further clinical data) and a final consensus diagnosis was achieved. Ten percent of cases were randomly chosen for review by BJM.

### Genotyping and quality control

The study sample was recruited and genotyped in consecutive phases over 15 years. The family sample (n=658) was genotyped using the Illumina CNV370 Beadchip array; unrelated controls (n=199) were recruited early in the study and genotyped on Illumina OmniExpress-12 arrays; subsequently recruited cases and controls were genotyped in two batches (wave 1=1370; wave 2=1008) using the Illumina Infinium PsychArray BeadChip (PsychChip). Note that the numbers of samples mentioned here reflect pre-QC totals.

### MDS analysis

A multi-dimensional scaling (MDS) analysis was performed to test for array effects and whether the Indian samples were genetically similar to the South Asian (SAS) population of 1000 Genomes (1KG) phase 3 reference data (eFigures 1-3). This latest version of 1KG includes the following SAS samples of relevance to our study cohort: Bengali in Bangladesh (BEB); Indian Telugu, UK (ITU); Punjabi in Lahore, Pakistan (PJI); and Sri Lankan Tamil in the UK (STU). (<https://mathgen.stats.ox.ac.uk/impute/1000GP%20Phase%203%20haplotypes%206%20October%202014.html>). The MDS analysis was based on all SNPs in common between the Indian family and case-control data sets and the 1000 Genomes data set

(2504 samples; 26231 SNPs after pruning). Strand ambiguous SNPs were removed to avoid strand mismatches. eFigures 1-3 depict a graphical representation of the Indian Tamil samples relative to all the SAS data. In the first dimension (eFigure 1), all four of our component data sets are isolated from the rest of the super population (American, African, European, East Asian) and overlap with SAS population. This overlap is seen in more detail in the second dimension (eFigure 2). The lack of outliers confirms that our samples are of Indian ancestry.

## Genotype imputation

### Pre-Imputation QC

To check and identify genetically related individuals we generated a set of 26939 LD independent SNPs with minor allele frequency  $> 0.05$  that were common across all genotyping platforms. For each of our four data sets, we identified sample duplications and mis-specified relationships in family samples through IBD analysis and cross-checking with the clinical records. For case-control data sets we excluded related individuals with PI-HAT  $\geq 0.1875$  (i.e. individuals beyond 2nd degree relatedness). We then merged the four data sets to identify inter-data set discrepancies such as mis-specified relatedness both within and between families. One hundred and forty-three individuals were removed. Before imputation, each cleaned data set was filtered with the following parameters: `--geno 0.02 --maf 0.01 --hwe 0.001 --mind 0.1`

### Imputation

We imputed each of our four data sets to 1000 Genomes (1KG) phase 3 (see description above). We updated SNP coordinates to human genome build 37 and flipped to the positive strand. Phasing was performed using SHAPEIT v2.72720. Imputation was then conducted using IMPUTE v2.3.021, with each chromosome being split into 5Mb segments with 250kb overlap, and using all 1KG populations (~2,504 individuals) as the reference (as recommended by the authors). Output was converted to 'best guess' genotypes in binary PLINK format.

### Post-imputation QC

A total of 81,177,102 imputed SNPs was reduced to ~6.2 - 6.5 million SNPs by removing SNPs with an INFO score  $< 0.8$ , MAF  $< 0.05$ , missing data rate  $> 0.05$ , or HWE P value  $< 1 \times 10^{-6}$ . The four data sets were merged before further QC was conducted according to Psychiatric Genomics Consortium guidelines (<https://sites.google.com/a/broadinstitute.org/psych-chip-resources/qc-methods>) by removing SNPs with: (a) a call rate difference between cases and controls with P value  $< 1 \times 10^{-5}$ ; (b) a HWE P-value  $< 1 \times 10^{-6}$  in controls; and (c) a HWE P-value  $< 1 \times 10^{-10}$  in cases. Finally, as recommended by GCTA, SNPs with a missing data rate  $> 0.005$  were removed.

A total of 5,582,932 variants and 3092 individuals (1321 cases; 1771 controls) passed all filters and QC.

## SNP-based heritability estimate

Using Genome-wide Complex Trait Analysis (GCTA v1.24.722<sup>3</sup>), we conducted GREML analysis to quantify proportion of variance attributed to genome-wide SNPs or SNP-based heritability. We estimated the genetic relationship matrix (GRM) between all pairs of individuals using data on 5,582,932 autosomal SNPs (by first estimating GRMs using SNPs on each of the autosomes and then merging to create a single GRM). Individuals with relatedness  $\geq 0.05$  (~3<sup>rd</sup> cousins or closer) were removed (`gcta --grm --grm-cutoff 0.05`), leaving 2210 individuals (945 cases, 1265 controls). We estimated the variance explained by all autosomal SNPs (`gcta --reml`), fitting 20 PCs estimated from the data, sex and SNP array as covariates. Lifetime risk was assumed to be 0.01 for conversion of SNP-based heritability from the observed to the liability scale.

We performed additional analyses in which the genetic variance was partitioned by chromosome: one in which the GRMs for the 22 autosomes were fitted simultaneously in a single model (GCTA's `--reml-no-constrain --mgrm-bin`), and another in which the GRM for each chromosome was analysed separately (GCTA `--reml-no-constrain --grm`). If the variance explained by the 22 individually estimated variances was greater than that for the 22 simultaneously estimated variances then this would be evidence for stratification in the data<sup>4</sup> (eFigure 4 in the Supplement).

## Genome-wide association analyses

The data set consisting of 3092 samples was split into two data sets for association analysis. The first was a case-control sample of unrelated individuals (Ncase=816; Ncontrol=900). The second comprised the family samples (Ncase=505, Ncontrol=871, Nfamily=405). For both samples we used GCTA's `-mlma-loco` (leaving-one-chromosome-out) function which conducts association analysis for each SNP in turn fitting a GRM based on all chromosomes but leaving out the chromosome on which the

candidate SNP is located. Ten principal components (PCs) were utilised to control for population/family stratification/cryptic relatedness calculated using PC-AiR,<sup>5</sup>. Genotyping chip-type was fitted as a covariate to control for batch effects. The genomic inflation factor,  $\lambda$ , was calculated individually for each data set. GWAS test statistics were corrected for inflation before meta-analysis with GWAS test statistics from the case-control samples using METAL (2011-03-25).<sup>6</sup>

## Chromosome X analysis

Chromosome X imputation was conducted for subjects passing quality control for the autosomal analysis. A unified data set was generated for subsequent analyses that include all SNPs and individuals passing the above filtering criteria in both the male and female QC groups. To generate a unified data set we applied additional exclusions of chromosomal X SNPs with missingness  $\geq 0.05$  or HWE  $P < 10^{-6}$  in females. To consider differences in genotyping between hemizygous males and diploid females, we used XWAS<sup>7</sup> to apply all the aforementioned QC steps of samples separately for males and females.

X-specific QC steps were performed using XWAS 2.0<sup>7</sup> on the unified data set. These included: removing SNPs with significantly different MAF between male and female samples in the controls; removing SNPs with significantly different missingness rates between male and female controls; and the removal of SNPs in the pseudoautosomal regions (PARs). Analysis was performed using GCTA separately for related males and females and unrelated males and females, and they were meta-analysed using METAL.

## Verification of Indian top locus

### *Imputation batch-based meta-analysis*

As a sensitivity analysis, to check that the significant association in our top locus is not an artefact of batch effects, we split the 3092 samples based on array types in which they were genotyped and imputed. Of the 3092 samples, 640 were genotyped using Illumina CNV370, 1361 were genotyped in PsychChip Wave 1 and 895 were genotyped in PsychChip Wave 2. These samples were analysed separately using GCTA mlma-loco. Samples from PsychChip Wave 2 were split into family (N=625) and unrelated (N=270) samples since the GWAS results were deflated. In this sensitivity analysis, 196 control samples genotyped as a stand-alone batch using Illumina OmniExpress-12 arrays were excluded. The meta-analysis for the included data sets (minus the 196 control samples) were performed using METAL.

### *Post-imputation batch-associated QC*

The samples were genotyped in 4 batches over 10 years. The samples were imputed in 4 batches at the end of the 10 years. Since this process could lead to batch specific artefacts during genotyping and imputation, we performed four GWASs by setting each batch in turn as “case” and the remaining batches as “controls” to identify SNPs associated with a particular batch. To avoid confounding by case status, each of the four GWASs was performed using only the controls. SNPs with a p-value  $< 5 \times 10^{-8}$  across 4 GWASs were removed, since each such result reflected a batch effect, in line with recently published protocols.<sup>8</sup>

## Genomic profile risk scoring (PRS) analyses

Many SNPs are associated with disease at a level that does not reach genome-wide significance. Capturing their contribution can deepen our understanding of schizophrenia’s polygenic architecture. We conducted PRS<sup>9</sup> using PGC2 meta-analyses results as the “discovery” sample and our Indian summary statistics as the independent “target” sample to determine whether European PRS could predict schizophrenia in our Indian sample. Results are presented using both the observed scale (0 or 1 i.e. binary trait) (eFigure 11) and the liability scale (included in eResults), adjusted for potential ascertainment bias including disease prevalence, and interpretable across studies.

The PGC2 schizophrenia association analysis was based on the “discovery” sample of 35,476 cases and 46,839 controls, affording the highest precision to date to the individual SNP estimates and thus good power in the profile scoring analyses.<sup>10</sup> In order to obtain a highly informative SNP set with the least statistical noise, we excluded uncommon SNPs (MAF  $< 5\%$ ), low-quality variants (imputation INFO  $< 0.9$ ), indels, and SNPs in the extended MHC region (chr6:25-34 Mb).

Since we used a summary statistics-based analysis in PRSice v1.25,<sup>11</sup> the following stringent clumping parameters were used as per gtx (Genetics ToolboX)(R package) recommendation.

```
--clump-p1 0.5 --clump-p2 0.5 --clump-r2 0.05 --clump-kb 300
```

Only SNPs that were in common between Indian samples and the PGC2 schizophrenia association analyses were included in the profile scoring (953849 SNPs overlapping; 32176 SNPs after clumping).

We performed high resolution PRS of our target summary data to identify the best fit  $P_T$  and to obtain results calculated at broad p-value thresholds ( $5 \times 10^{-8}$ ,  $1 \times 10^{-6}$ ,  $1 \times 10^{-5}$ ,  $1 \times 10^{-4}$ , 0.001, 0.01, 0.05, 0.1, 0.2, 0.3, 0.4, 0.5).

Individual profile scores in the “target” samples were calculated as the sum of the count of the risk alleles weighted by the log of the odds ratio from the PGC2 association analysis, divided by the total number of SNPs.

These results reflect the variance explained on the observed probability scale,<sup>12</sup> quantified as Nagelkerke’s  $R^2$  (NK- $R^2$ ) and transformed to the liability scale<sup>4</sup> assuming a baseline population risk of 1%. We examined whether the observed fraction of results at  $P_T = 0.05$  displaying the same direction of allelic effects across PGC2 and India was significantly greater than expected by chance (i.e. 50%) using the binomial Sign Test. eTable 9 shows the total number of SNPs, the SNPs sharing the same direction of effects, and their respective sign test for all the SNPs included below the p-value threshold ( $P_T = 0.05$ ) and MAF ranges <0.1, 0.1-0.2, 0.2-0.3, 0.3-0.4, 0.4-0.5.

We used sign tests to compare the patterns of results between our Indian GWAS results and those of the PGC2. We used the clumping settings above to derive a filtered set of SNPs. We then determined the number of SNPs whose logistic regression beta coefficient signs were the same between two independent samples. The significance of the observed proportion differing from chance (50%) was evaluated using the binomial distribution.

## Post-GWAS extended bioinformatics analyses

### Statistical Fine mapping

PAINTOR (ver 3.1)<sup>13,14</sup> was used for statistical fine mapping analysis by integrating functional genomic data (Transcription Factor Binding Sites; Methylation sites in brain regions - Hippocampus, Cingulate, Frontal Lobe) in the top Indian locus. We used our Indian data set as the LD reference data set.

### Natural Selection

Using the Geography of Genetic Variants browser<sup>15</sup> we identified worldwide patterns of allele frequency distribution for our top SNP. We then used the R package Rehh 2.0.2 to detect signatures of selection using Extended Homozygosity Haplotype(EHH) based test. We used  $R_{sb}$  (i.e. the observed of standardised log-ratio of the integrated EHHS(iES) between pairs of populations) to detect signals of positive selection.

### Transethnic Meta-analysis

We transformed the MLMA-loco effect sizes generated in our Indian data set using a recently published method.<sup>16</sup> The transformed odds ratios were utilised for transethnic meta-analysis with the PGC2 data set.

Regional plots were generated using LOCUSZOOM (<http://locuszoom.org/genform.php?type=yourdata>) to investigate our top locus with 100Kb and 1000Kb windows, and a threshold of  $r^2 > 0.6$  to define the LD block. To investigate the regulatory effects of our top SNP, we interrogated the expression quantitative trait loci (eQTL) databases, Brain eQTL Almanac (BRAINEAC)<sup>17</sup> (<http://braineac.org/>), Genotype-Tissue Expression (GTEx v7)<sup>18</sup> (<https://www.gtexportal.org/>) and the Common Mind Consortium (CMC)<sup>19</sup> (<https://www.synapse.org/#!Synapse:syn2759792/wiki/>). We also utilized the Human Brain Transcriptome (HBT)<sup>20</sup> (<http://hbatlas.org/>) to examine spatio-temporal patterns of genes and transcription factors located in our top locus.

### Trans-ethnic genetic correlation for SCZ between India and Europe

We used POPCORN<sup>21</sup> to estimate trans-ethnic genetic correlation between PGC2 and Indian Summary Statistics; there was no significant finding because the sample size of our Indian data set was comparatively small ( $n=3092$ ).

### SMR analysis of top Indian locus

SMR (Summary-data-based Mendelian Randomization) ver. 0.712 and Brain-eMeta eQTL summary data ( $n=1,194$  samples) were used for SMR single/multi SNP based methods and HEIDI (HEterogeneity In Dependent Instruments) analysis.<sup>22</sup> This analysis was conducted to identify genes within our top locus whose expression levels were associated with schizophrenia due to pleiotropy in our Indian data set. We used our top SNP and genes in our top locus to interrogate the Brain-eMeta eQTL data ( $n=1,194$  samples).<sup>23</sup>

## Pathway analyses

Gene-set based analyses were performed using MAGMA v1.06.<sup>24</sup> SNPs were mapped to genes according to their position in the NCBI 37.3 build and with a 35 kb 5' and 10 kb 3' window around each gene. Gene-sets from REACTOME-MSigDB version 6.0 were used for pathway analysis. For genes, the summary statistics from the imputed GWAS were used to derive gene-based statistics using the South Asian 1000 genomes reference panel (SAS phase 3) to model linkage disequilibrium. MAGMA tests for gene set enrichment by first generating a gene-wide statistic from the GWAS results files, adjusting for gene size, SNP density and linkage disequilibrium effects (eFigure 18). MAGMA then performs a competitive test of gene set association to investigate if associative enrichment within a user-defined gene set outperforms other gene sets from across the genome of similar size.<sup>24</sup> SNP-wise=top was used as the gene analysis model since a smaller percentage of SNPs had p-values approximating the GWAS significance threshold. The analysis accounted for synonymous SNP IDs and an adaptive permutation procedure was used to account for varying gene p-values since a large number of permutations only has added value if the p-value is very low.

## Network connectivity-enrichment analysis

We used MAGNUM<sup>25</sup> to evaluate whether genes perturbed by schizophrenia-associated variants are enriched for tissue-specific gene regulation. The steps involved aggregating GWAS summary statistics at the level of genes using gene-based analysis; we used MAGMA to generate the gene-based statistics. We then defined the proximity of genes within the network, computing and summarizing connectivity-enrichment curves, then computing empirical p-values and finally defining a connectivity enrichment score for our GWAS summary statistics as the negative  $\log_{10}$  of the empirical p-value. We interrogated 32 higher level regulatory networks from FANTOM 5, GTEx expression networks and brain tissue specific regulatory networks to identify enriched networks perturbed by schizophrenia associated variants from our Indian summary statistics.

## Post-GWAS functional analyses

### Cell line assays

To validate the imputed genotypes for our top locus, we sequenced the region between *MROH6* and *NAPRT1*. DNA haplotypes in the sample population were extracted from genotype data. The four haplotypes of interest, representing 98.7% of the alleles in the Chennai Indian population, were PCR amplified from genomic DNA from three individuals. (eTable 5).

To assess the effect of allele-specific expression, we measured expression of genes at the rs10866912 locus in lymphoblastoid cell lines established from 60 individuals within the study population. We randomly selected cell lines from 20 individuals from the population for each of the AA, CA, and CC rs10866912 genotypes and measured expression of genes within our locus defined by  $r^2 > 0.6$ : *NAPRT1*, *EEF1D*, *PYCRL*, *TIGD5*, *GSDMD*, and *MROH6*.

### Establishment of lymphoblastoid cell lines

Lymphocytes were extracted from fresh, whole blood samples using a Ficoll gradient, and transformed with Epstein Barr Virus (EBV). Briefly, lymphocytes were incubated with a virus preparation from the EBV-producing marmoset B-cell line B95-8 and treated with phytohaemagglutinin (Sigma). Cells were plated out in 96-well plates and incubated at 37° in 95% air/5% CO<sub>2</sub> for up to 5 weeks with twice weekly media changes until transformed lymphoblastoid cells became apparent.

### RNA expression analysis

Total RNA was extracted from lymphoblastoid cell lines using the RNeasy mini kit (Qiagen). One  $\mu$ g of RNA from each cell line was reverse transcribed using the SuperScript VILO cDNA Synthesis Kit (ThermoFisher). cDNA levels were measured in triplicate using exon-spanning Taqman probes, normalised to expression of GAPDH using the  $\Delta\Delta$ Ct method. Expression results for each genotype were pooled.

## Zebrafish maintenance and transgenic lines

Adult Zebrafish and embryos were maintained by standard protocols approved by the University of Queensland Animal Ethics Committee. Ethics committee approval IMB/266/15/NHMRC.

To select target sequences on the *dre-naprt1* mRNA, we first used the Invitrogen BLOCK-IT RNAi Designer (miR) using the full 3'UTR of *dre-naprt1* (ENSDART00000038157.5). Among the different hits obtained, we ran BLAST to select synthetic miRNA

that did not show off-target on the zebrafish genome. Three synthetic miRNAs were selected based on their BLOCK-IT score, no off-target and no overlap on the 3'UTR of *dre-naprt1* mRNA. Forward and reverse primers generated are presented in eTable 4.

#### *Generation of dre-naprt1 loss-of-function transgene*

Each forward and reverse primers oligonucleotides (artificial pri-miR, eTable 4) were first annealed. 5 µl of 200 µM of each forward and reverse primer were mixed in a 20 µl reaction including 2 µl NEB10x buffer<sup>2</sup>. The mixture was heated to 95°C for 5 min using a thermocycler and left to cool down in the thermocycler's plate for 30 min. Annealed artificial pri-miR was mixed and briefly spun down before being diluted 5,000-fold in water at room temperature. Diluted samples were stocked at room temperature until ligation. The pME-RNAi652 plasmid<sup>26</sup> was digested with BsmBI enzyme and gel-extracted/purified for inserting the annealed primers (artificial pri-miR), 10 ng of linearized pME-RNAi652 construct was mixed with 4 µl of the aforementioned 1:5,000-dilution and ligated following the manufacturer's instruction (NEB T4 DNA ligase). We obtained 3 different plasmids that were sequenced, one for each artificial pri-miR, named pME-R-NAPRT1-1, pME-R-NAPRT1-2 and pME-R-NAPRT1-3. We then chained the different miRNAs as presented previously.<sup>27</sup> We finally generated a plasmid carrying the 3 synthetic anti-NAPRT1 miRNAs in the following order: 1-2-3, named pME-R-NAPRT1-123. To generate a final plasmid for integration into the zebrafish genome, we proceeded to a gateway LR reaction with the following plasmids, p5E-UBIQUITUIN, pME-R-NAPRT1-123, and destination tol2 plasmid 1456<sup>26</sup>. The final plasmid was named UBI-R-NAPRT1-123 and drives i) the ubiquitous co-expression of dsRED (red fluorescence) with the synthetic anti-NAPRT1 miRNA, ii) the tissue-specific lens expression of GFP for assisting in the selection of transgenic animals that will have integrated the transgene. For the control transgene, we follow the same methods using an empty pME-RNAi.

#### *Loss-of-function transgene injections and generation of F0 fish*

To integrate DNA constructs into the zebrafish genome, 1 to 2 nl of a mix containing 30 ng/µl of DNA of interest plus 25 ng/µl of Transposase mRNA and phenol red were injected into one-cell stage wt zebrafish embryos (F0 fish).

#### *F1 transgenic line selection*

F0 injected fish were selected at 72 hours-post-fertilization (hpf) based on both strong mosaic ubiquitous dsRED expression and GFP expression in their lens. Sixty fish were raised until adulthood. Individual F0 adult were then outcrossed with wt (AB) fish for selecting the founder giving birth to F1 transgenic animals who have integrated the construct into their genome. Seven lines have been isolated and the F0 fish giving birth to animals with the strongest dsRED expression was selected for the analysis and for establishing the UBI-R-NAPRT1-123 line.

#### *dre-naprt1 mRNA injections*

To synthesize *dre-naprt1* mRNA for rescue experiments, we first amplified *dre-naprt1* cDNA using primers dreNAPRT1-Forward and dreNAPRT1-Reverse flanked by compatible gateway BP sequences (eTable 4). The corresponding PCR product was then inserted into pDONR221 through a gateway BP reaction following manufacturer instructions. The resulting plasmid was named pME-NAPRT1. We then generated a final construct for RNA synthesis through a gateway LR reaction mixing pME-NAPRT1, p3E-polyA (tol2kit 302 plasmid) and a custom R1R3 gateway pDEST presenting a T3 promoter. The final construct was named T3\_NAPRT1\_PA. *dre-naprt1* mRNA was then synthesized using a mMACHINE T3 transcription kit following manufacturer instructions, and purified using a MEGAclear kit following manufacturer instructions. *dre-naprt1* mRNA was injected at 150 pg into one-cell stage zebrafish embryos.

## eResults. Findings

### SNP heritability

SNP heritability on the liability scale was estimated to be 0.287 (SE: 0.073), assuming a disease prevalence of 0.01 ( $P = 3.61 \times 10^{-5}$ ). This estimate is higher than the estimate for schizophrenia in Europeans 0.23 (SE: 0.01), reported by Lee *et al.*,<sup>4</sup> but comparable to the estimates for individual cohorts in their study.

The variance explained by all chromosomes fitted independently (0.309) was only slightly higher than that explained by all chromosomes fitted simultaneously (0.296), suggesting little evidence for stratification.

### Verification of Indian top locus

#### Imputation batch-based meta-analysis

The meta-analysis q-q plot showed a mild deflation ( $\lambda = 0.98$ ) showing no evidence for residual populations stratification, but rather marginal evidence for overfitting/overcorrection conservative results (see eTable 4; eFigure 6). SNP rs10866912 was the most associated locus as reported for the main analysis. The magnitude and direction of the effect size was unchanged (OR 1.27), but as expected, given the smaller sample size, the association P-value was slightly increased ( $P\text{-value} = 3.53 \times 10^{-7}$ ).

#### Post-imputation batch-associated QC

Of 5.5 million SNPs, 228 SNPs were removed for being observed to have genome-wide significant batch associations ( $P < 5 \times 10^{-8}$ ). The most significant SNP in this list of 228 SNPs had a p-value of  $3.66 \times 10^{-3}$  in the Indian GWAS. None of the SNPs in our top Indian locus were in this list, confirming that the batch effect was not confounding this locus. We have regenerated the Manhattan plot excluding these SNPs.

### SMR analysis

Since the eQTL data were predominantly European and our GWAS data were of Indian ancestry, there were significant haplotype frequency differences between these data sets: in particular, the frequency of the haplotype containing allele “C” of our top SNP, rs10866912 was ~0.26 in Indians compared with ~0.47 in Europeans. For rs10866912, only four genes in the eQTL data set surpassed the eQTL threshold ( $P < 5 \times 10^{-8}$ ); of these, *NAPRT1* had the most significant SMR p-value ( $P = 2.63 \times 10^{-07}$ ). The SNPs in high LD with rs10866912 (rs10866911, rs4873803, rs4873804) also gave the most significant results with *NAPRT1*.

### Trans-ethnic replication of PGC2 loci in Indian data set

We analysed all (108) genome-wide significant PGC2 loci in our Indian data set. We mention here:

(a) the top PGC2 locus (MHC region on chromosome 6p22): Using LDlink<sup>28</sup> we identified proxy SNPs for the top PGC2 SNP (rs115329265-Old ID, rs1233578 –New ID according to dbSNP142) in this region, because this SNP did not survive QC in our Indian data set. For this SNP, there were four SNPs in LD > 0.9 (~28Kb region) and 302 SNPs in LD > 0.5 and < 0.9 (~995Kb region) in the 1000 Genomes CEU population. In contrast, for the 1000g STU population there were 13 SNPs in LD > 0.9 (~48Kb region) and 58 SNPs in LD > 0.5 and < 0.9 (~937Kb region). For this 48Kb region defined by LD > 0.9, we observed no evidence for replication ( $p < 0.05$ ) in Indian samples (eFigure 20). Possible explanations for this finding include: (i) relatively small Indian sample size reducing power to detect the variation; (ii) trans-ancestry allele frequency differences between Europeans and Indians; (iii) pathogen-driven selection of the risk allele in Europeans;<sup>29</sup> (iv) a pure schizophrenia phenotype (few cases of schizoaffective disorder) with negligible substance abuse in the Indian data set compared with PGC2 schizophrenia which is attended by significant co-morbid substance abuse.

(b) For all other PGC2 genome-wide significant loci, 96/107 regions had representative SNPs within the STU LD block in our Indian data set. Of these, 31 PGC2 regions replicated ( $P\text{-value} < 0.05$ ) in our Indian data set, with the chromosome 2q32.3 locus (rs59979824; ranked 66 in PGC2) having the best p-value (0.0007298) in our data set. (eTable 12 and eFigure 21)

### Genomic profile risk scoring (PRS)

European PGC2 SNPs achieving a threshold p-value ( $P_T = 0.05$ ) were most predictive of schizophrenia in India, explaining 5% (maximum Nagelkerke's  $R^2 = 0.05$ ;  $P = 2.2 \times 10^{-37}$ ) of the genetic variation when measured on the observed scale (zero or 1, i.e. binary trait), and 3% on the liability scale. The majority (53%) of SNPs below  $P_T = 0.05$  had the same direction of (genetic) effect



between PGC2 and India (53.48%, binomial  $P = 1.31 \times 10^{-15}$ ) (eTable 9), confirming that this result is highly unlikely to reflect chance.

## Post-GWAS extended Bioinformatics analyses

### *Gene-set analyses*

There were no Reactome gene-sets (including NAD<sup>+</sup> specific pathways) significantly enriched for association based on Bonferroni correction ( $0.05/630=7.9 \times 10^{-5}$ ). However, the top pathways with p-value < 0.01 were DSCAM interactions, Dopamine Neurotransmitter Release Cycle, Unblocking of NMDA Receptor Glutamate Binding and activation, and signal transduction by L1. These pathways are associated with brain development. The *DSCAM* (DS Cell Adhesion Molecule) gene is a member of the immunoglobulin superfamily of cell adhesion molecules involved in human central and peripheral nervous system development and mediates axon pathfinding. Among the other leading pathways, L1 plays an adhesive role in cell-cell interaction and also functions as a signal transducing receptor assisting neurons in axonal growth and guidance (<http://www.reactome.org/content/detail/R-HSA-445144>). Collectively these pathway-based findings are consistent with the neurodevelopmental hypothesis of schizophrenia.<sup>30</sup>

### *Network connectivity-enrichment analysis*

Of the 32 FANTOM 5 higher-level gene regulatory networks in humans, mesenchymal stem smooth muscle cells, and nervous system and hind brain networks generated the highest scores for our Indian summary statistics. When only brain regions were analysed, the putamen generated the highest enrichment score, similar to that observed in the PGC2 schizophrenia data set. Moreover, consistent with these results, the top four networks in humans identified by GTEx co-expression network analyses of our Indian data set were located in the brain (eFigure 19).

## Post-GWAS functional analyses

### *mRNA expression associated with the rs10866912 locus*

Our index SNP is located in an intergenic region spanning ~2Kb between *MROH6* and *NAPRT1* genes. Since our top locus was imputed, we sought to validate this sequence (2Kb) experimentally. Genotyping data indicated the presence of 4 distinct haplotypes in the 2Kb of genomic DNA between the *MROH6* and *NAPRT1* genes on chromosome 8, covering 98.8% of the alleles present in the study population. Haplotypes differed at 6 SNPs and one indel (eTable 5). The risk allele (A) of rs19866912 was present in haplotypes A, B, and C, with a combined frequency of 72% while the protective allele (C) of our index SNP was present in Haplotype D with a frequency of 26.8%. These haplotypes confirm that the genotyped alleles (A, C) and the alleles predicted by imputation (A, C) are identical for our index SNP.

## eFigure 1. MDS Analysis Using 1000g SAS Population

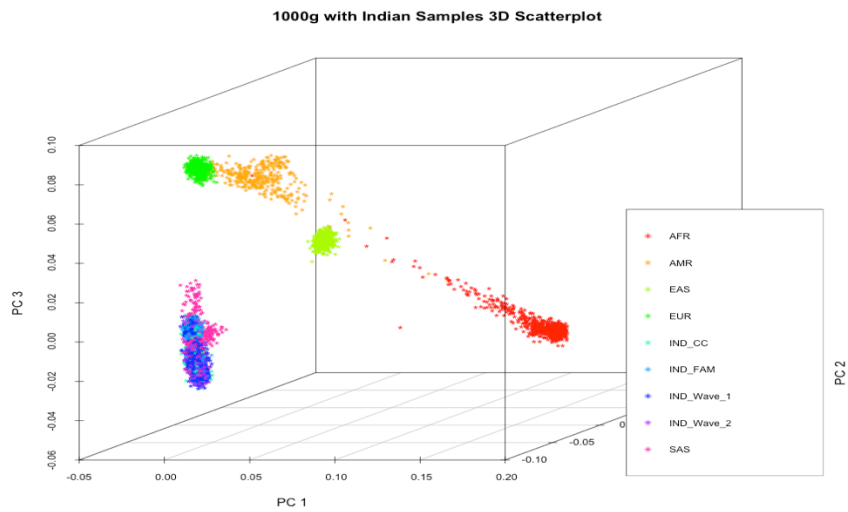

Super populations include African (AFR), Admixed American (AMR), European (EUR), East Asian (EAS) and South Asian (SAS). The four Indian data sets include IND\_CC, IND\_FAM, IND\_Wave1 and IND\_Wave\_2. The figure shows the 4 Indian data sets clustering with the SAS population in the bottom left corner.

## eFigure 2. MDS Analysis Using 1000g SAS Populations and Our Indian Data Set

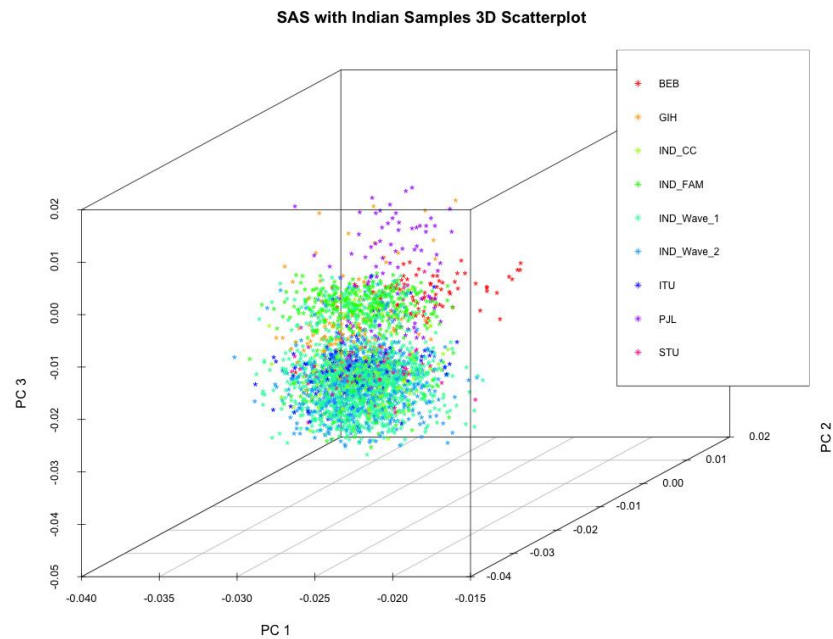

Populations of SAS include Bengali from Bangladesh (BEB), Gujarati Indians from Houston, Texas (GIH), Indian Telugu from the UK (ITU), Punjabis from Lahore, Pakistan (PJJ) and Sri Lankan Tamils from the UK (STU). The four Indian data sets (IND\_CC, IND\_FAM, IND\_Wave1 and IND\_Wave\_2) were genotyped using three different Illumina arrays and cluster accordingly in this figure.

### eFigure 3. MDS Analysis Using 1000g Super Populations

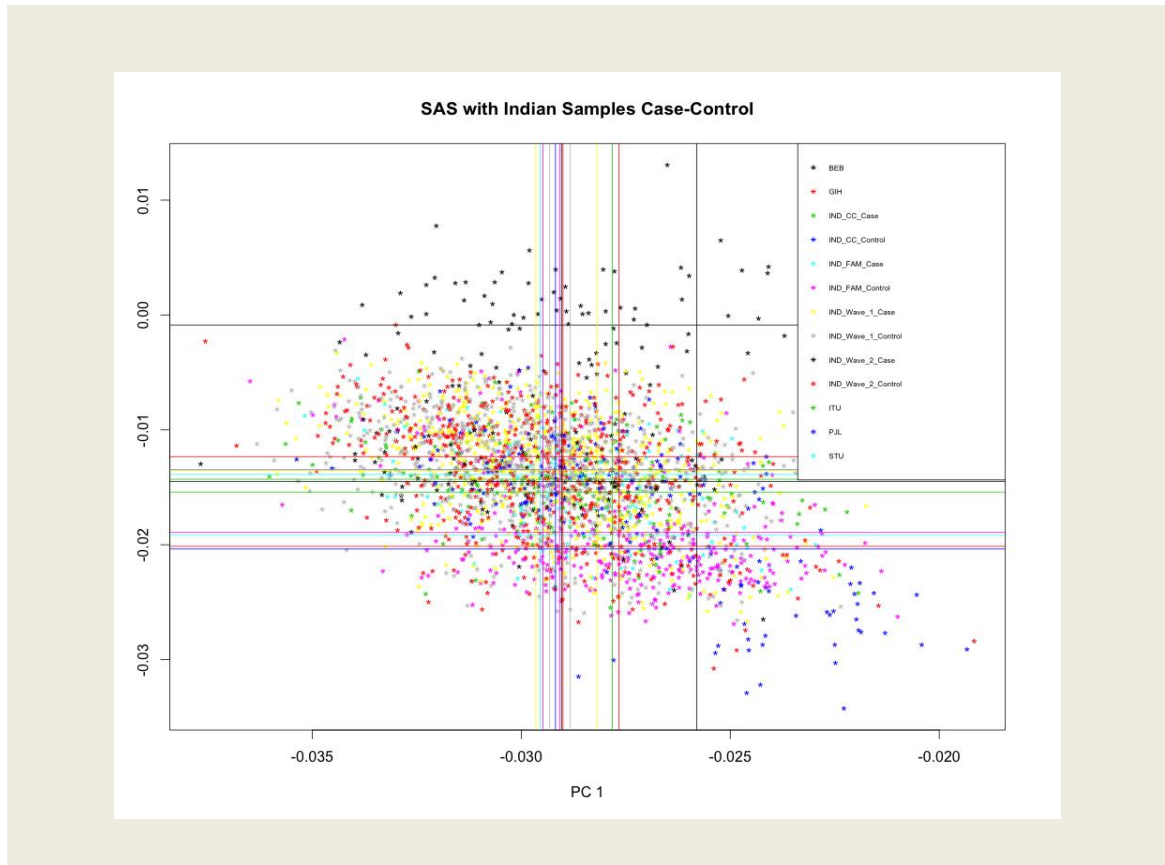

Each of the four Indian data sets is divided into cases and controls. Based on the Principal Component means, there is no case-specific bias.

**eFigure 4. SNP Heritability**

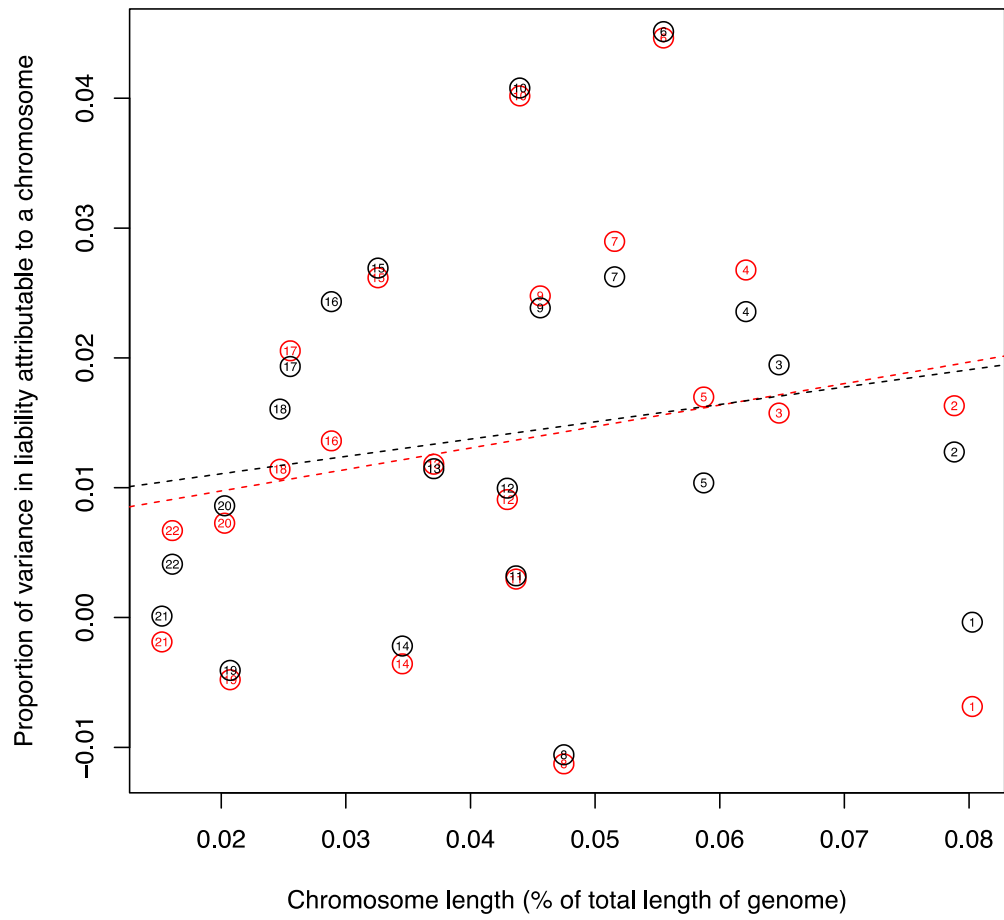

Estimated proportion of variance explained by SNPs on individual chromosomes from analysis of all chromosomes simultaneously (red) or separate analyses of each chromosome (black).

**eFigure 5. Q-Q Plot for Indian Meta-analysis**

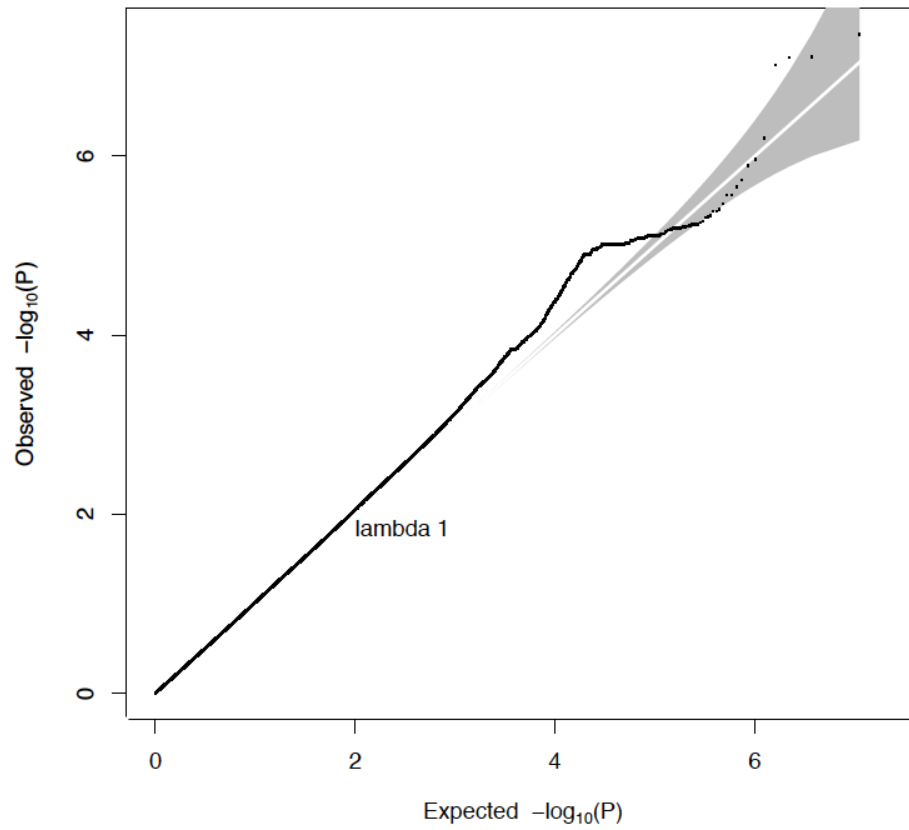

A meta-analysis of Indian case-control and family data sets. The observed  $P$ -values (y-axis) were compared with the expected  $p$ -values under the null distribution (x-axis). The plot was generated by genomic correction for family data which was then meta-analysed with case-control data. The resultant  $\lambda_{GC} = 1$ .

**eFigure 6. Q-Q Plot for Indian Batch-Based Meta-analysis**

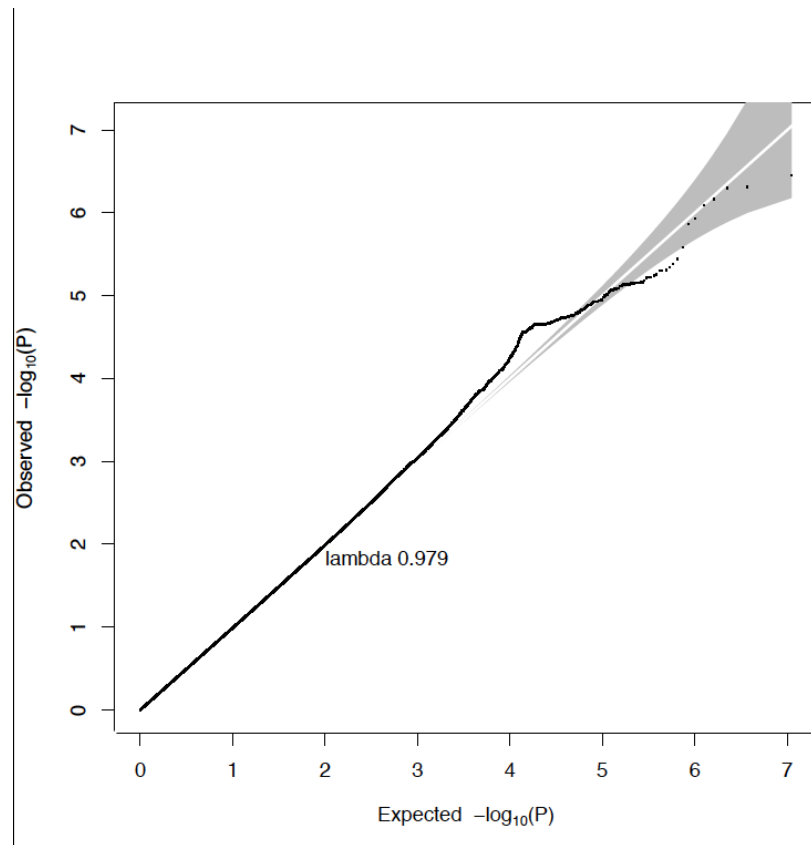

A meta-analysis of Indian CNV370, PsychChip Wave 1, PsychChip Wave 2 Family and PsychChip Wave 2 unrelated data set. The observed  $P$ -values (y-axis) were compared with the expected  $p$ -values under the null distribution (x-axis). The plot was generated by genomic correction for family data which was then meta-analysed with case-control data. The resultant  $\lambda_{GC} \sim 0.98$ .

### eFigure 7. Regional Plot of Indian Chromosome 8q24.3 Locus (100-Kb Window) in PGC2 Data Set

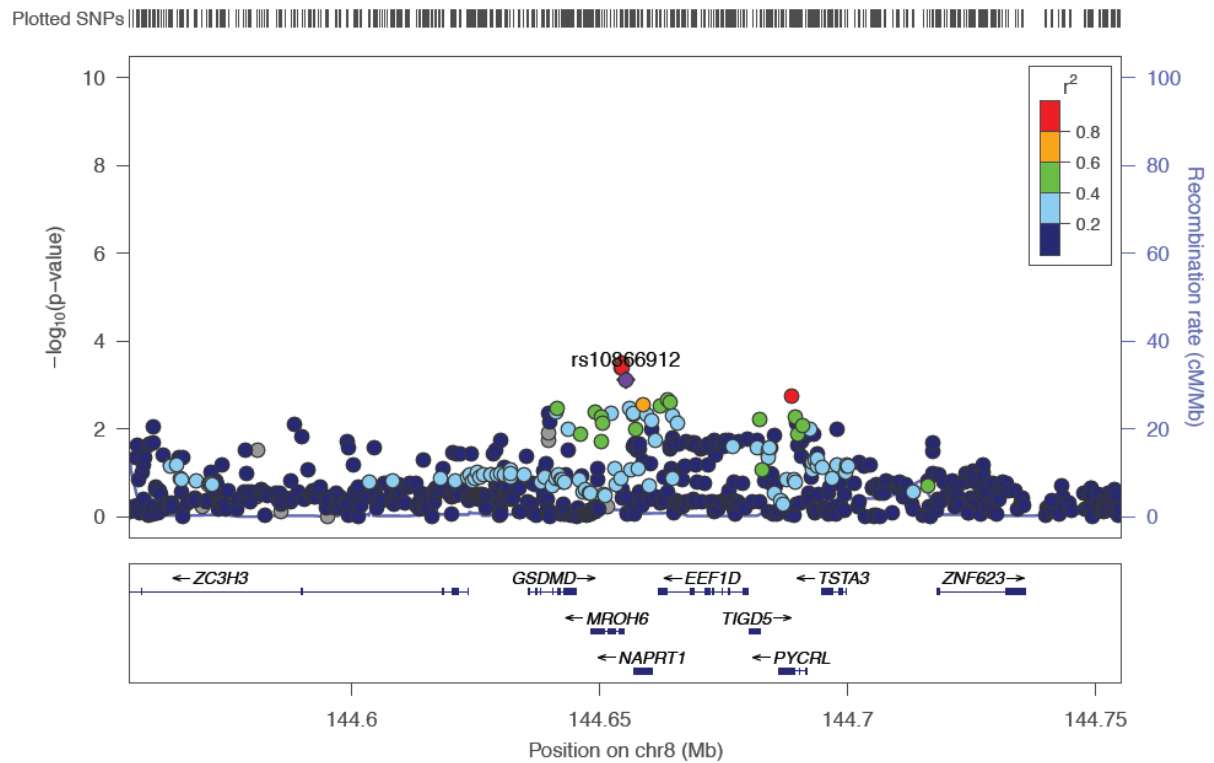

The index SNP, rs10866912 (coloured purple) was replicated ( $P = 7.56 \times 10^{-4}$ ) in PGC2. The other SNPs are coloured according to the degree of linkage disequilibrium (measured by  $r^2$ ) with the index SNP. The Thousand Genome Phase 3 EUR population was used to calculate LD. The x-axis shows the SNP locus position on chromosome 8 (GRCh37/hg19 build). The y-axis shows the significance of association ( $-\log_{10}P$ ). Nine genes are located within the 100Kb window, the direction of transcription (upstream/downstream) being annotated with arrows.



**eFigure 8. Manhattan Plot for PGC2-Indian Meta-analysis Using Metasoft-RE2C**

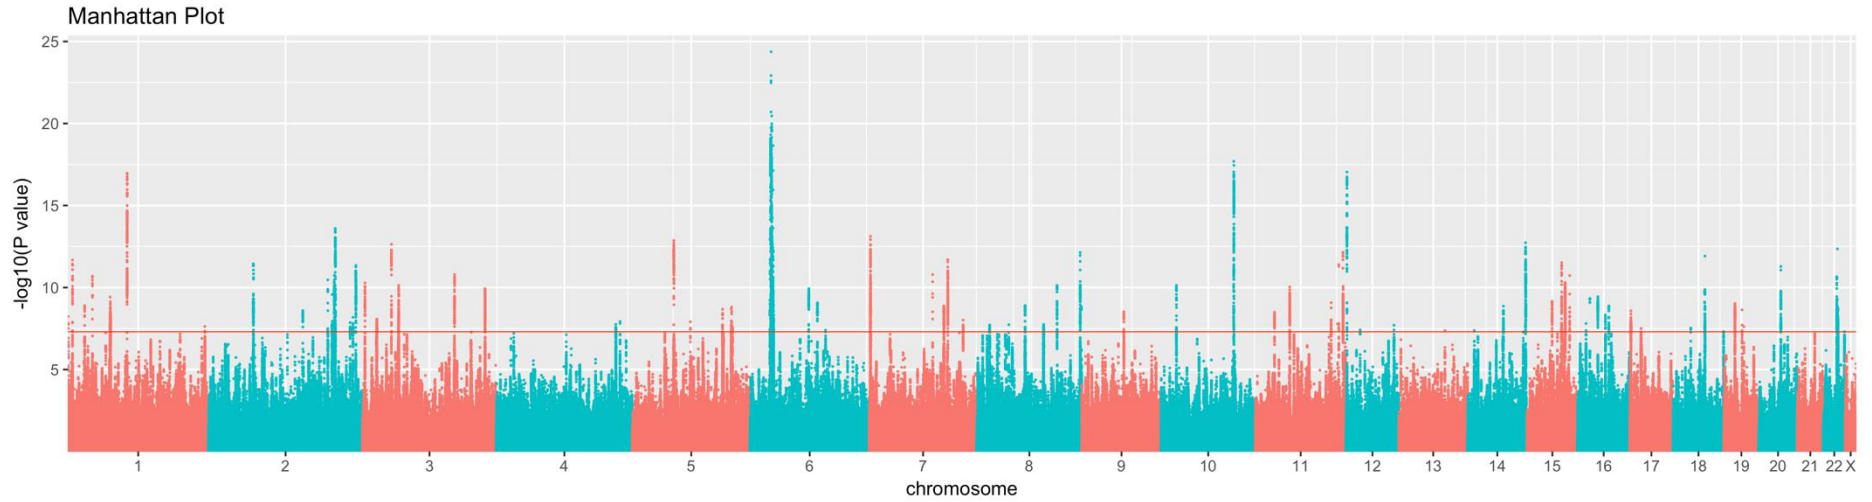

Manhattan plot showing genome-wide schizophrenia associations of PGC2 and Indian samples. The x-axis shows the chromosomal position and the y-axis the significance of association ( $-\log_{10}P$ ). The horizontal red line represents the level of genome-wide significance ( $<5 \times 10^{-8}$ ). Our top genome-wide significant locus is situated on chromosome 8q24.3 (rs10866912,  $P = 2.09 \times 10^{-9}$ ).

**eFigure 9. Regional Plot of Chromosome 8q24.3 Locus (100-Kb Window) in Cross Population Meta-analysis Results With SAS LD**

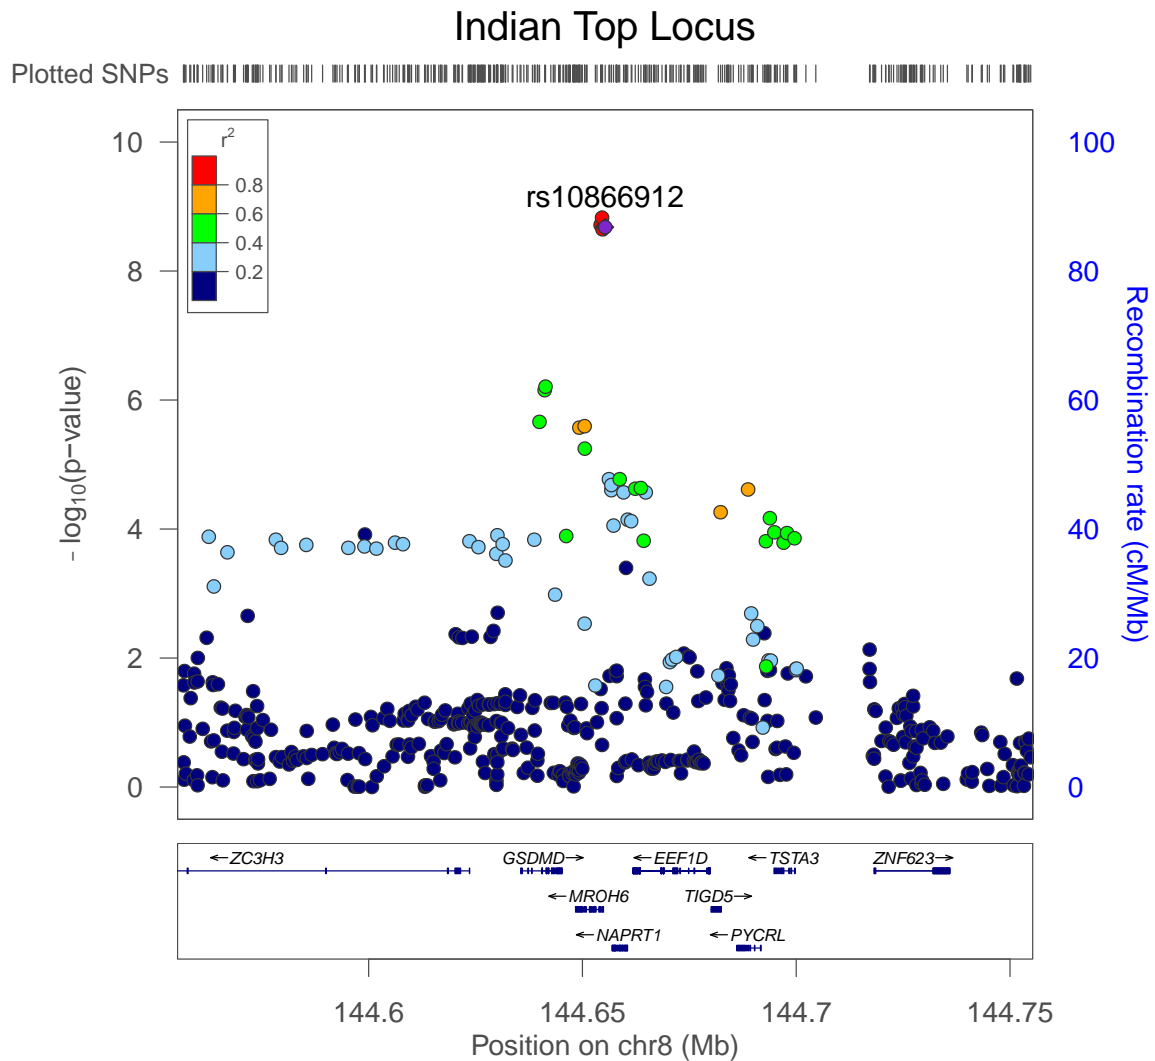

The index SNP, rs10866912 (coloured purple) was significant ( $P = 1.58 \times 10^{-09}$ ) in trans ethnic meta-analysis. The other SNPs are coloured according to the degree of linkage disequilibrium (measured by  $r^2$ ) with the index SNP. The Thousand Genome Phase 3 SAS population was used to calculate LD. The x-axis shows the SNP locus position on chromosome 8 (GRCh37/hg19 build). The y-axis shows the significance of association ( $-\log_{10}P$ ). Nine genes are located within the 100Kb window, the direction of transcription (upstream/downstream) being annotated with arrows.

**eFigure 10. Regional Plot of Chromosome 8q24.3 Locus (100Kb window) in Cross Population Meta-analysis Results With EUR LD**

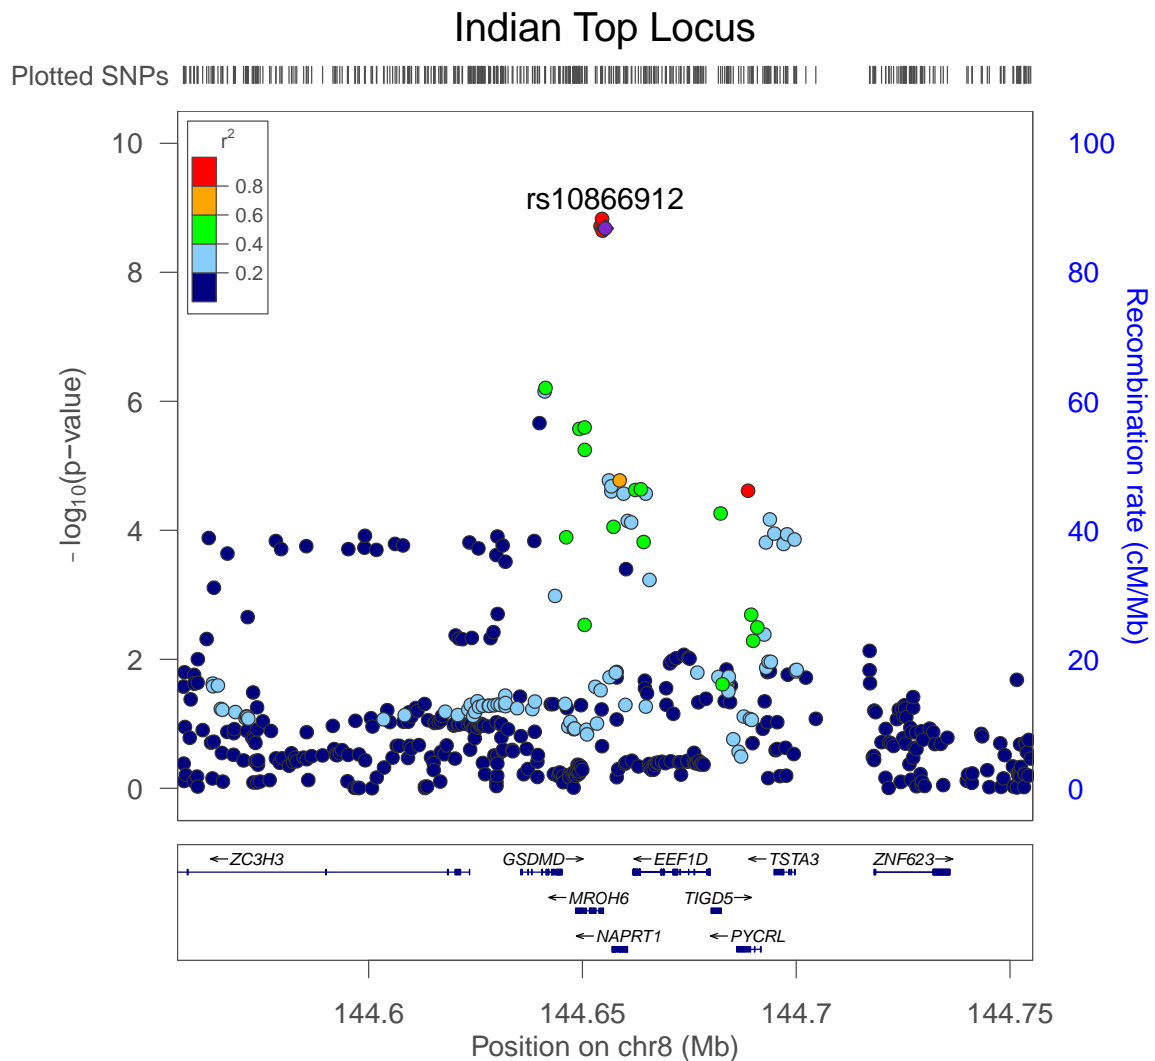

The index SNP, rs10866912 (coloured purple) was significant ( $P = 1.58 \times 10^{-09}$ ) in trans ethnic meta-analysis. The other SNPs are coloured according to the degree of linkage disequilibrium (measured by  $r^2$ ) with the index SNP. The Thousand Genome Phase 3 EUR population was used to calculate LD. The x-axis shows the SNP locus position on chromosome 8 (GRCh37/hg19 build). The y-axis shows the significance of association ( $-\log_{10}P$ ). Nine genes are located within the 100Kb window, the direction of transcription (upstream/downstream) being annotated with arrows.

## eFigure 11. Genomic Profile Risk (PRS) Scoring

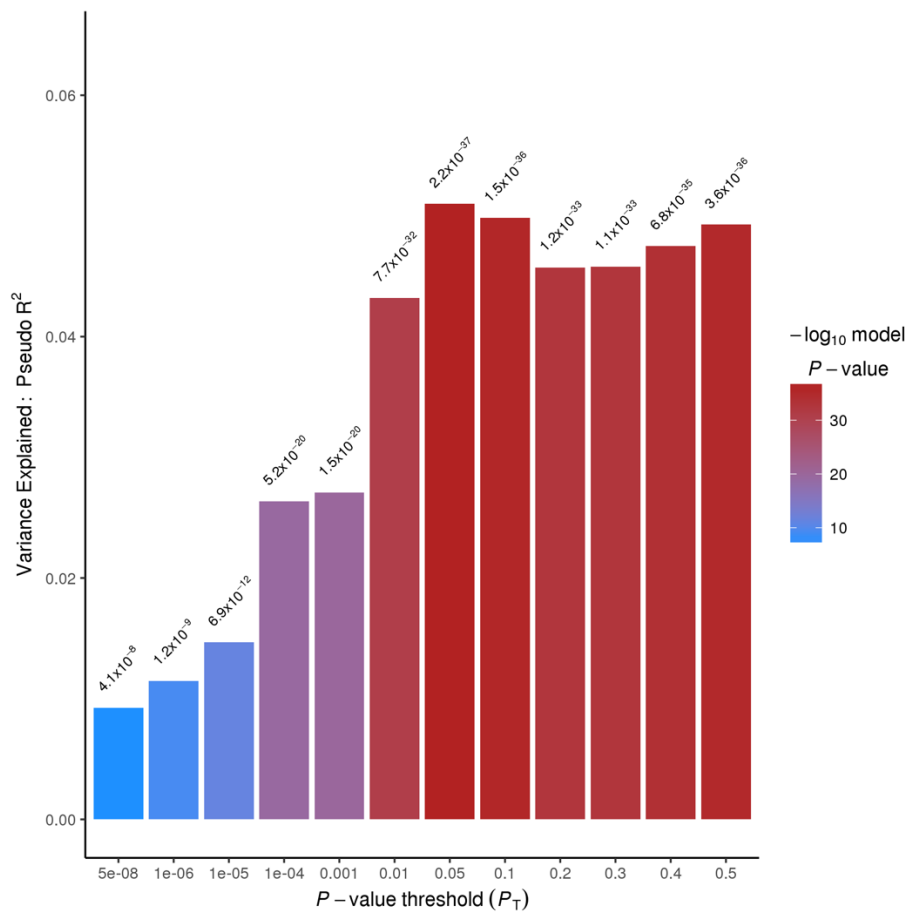

Results of profile risk scores using the PGC2 schizophrenia results as the discovery set and the Indian data set as the target set. The x-axis shows the  $P$ -value thresholds ( $P_T$ ) used to calculate the polygenic risk scores. The y-axis shows the Nagelkerke  $R^2$  values (observed scale), representing the proportion of variance in case-control status explained by the risk profile scores. The p-value for the risk profile score's predictive ability of case-control status for a given  $P_T$  is shown above each bar. European genetic profile scores (maximum Nagelkerke's  $R^2=0.05$ ;  $P = 2.2 \times 10^{-37}$ ) at  $P$  value threshold  $P_T = 0.05$  was most predictive of schizophrenia status in the Indian population.

## eFigure 12. Fine Mapping of Indian Top Locus

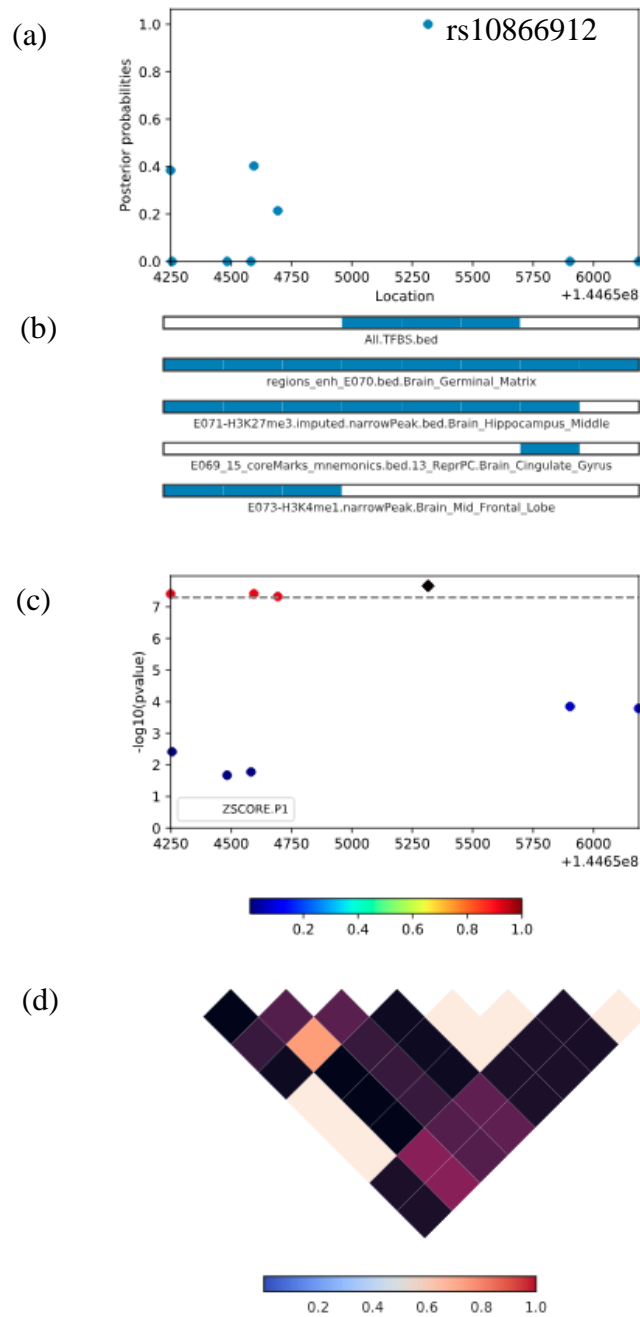

(a) Output from PAINTOR 3.1: demonstrating that our top SNP (rs10866912) has the highest posterior probability of all SNPs at the top Indian locus, quantifying the likelihood that this SNP is causal (i.e. should be prioritised for functional investigation); (b) – (d) depict inputs for PAINTOR; (b) Functional annotation data sets (from top to bottom: Transcription Factor Binding Sites; Enhancer regions; Methylation sites in brain (Hippocampus, Cingulate, Frontal Lobe)); (c) Z-scores at the given locus; (d) LD matrix of locus defined by  $r^2 > 0.6$ .



**eFigure 14. Lead SNP, rs10866912, Is Associated (eQTL) With Brain Expression of *NAPRT1***

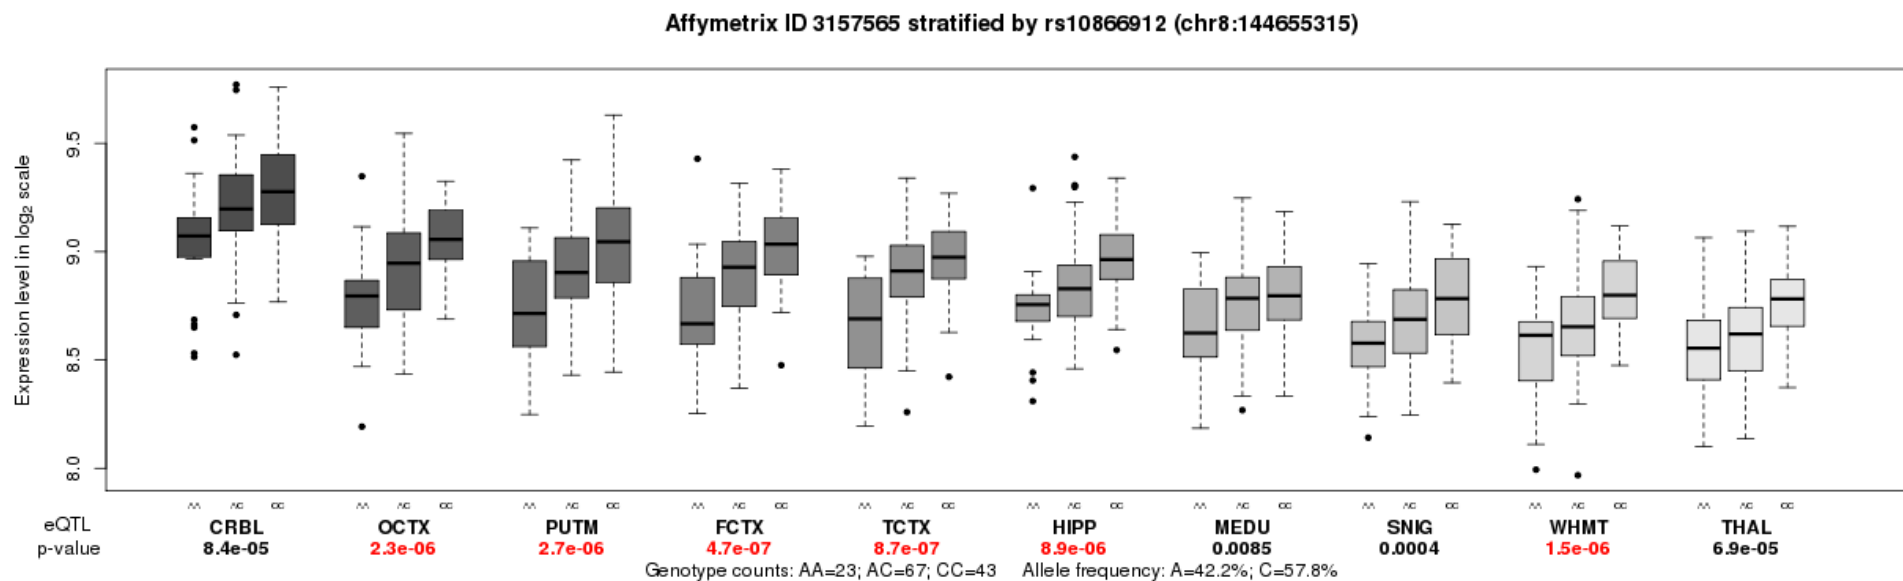

Source: BRAINEAC

Allele specific expression and eQTL for the lead SNP across 10 brain regions (BRAINEAC; <http://www.braineac.org>): cerebellar cortex (CRBL), frontal cortex (FCTX), hippocampus (HIPP), medulla (specifically inferior olivary nucleus, MEDU), occipital cortex (specifically primary visual cortex, OCTX), putamen (PUTM), substantia nigra (SNIG), thalamus (THAL), temporal cortex (TCTX) and intralobular white matter (WHMT). *P* values in red depict statistically significant results. Also see eTable 10.

**eFigure 15. Spatiotemporal Brain Expression Profiling of Genes in Top Locus**

**(A)**

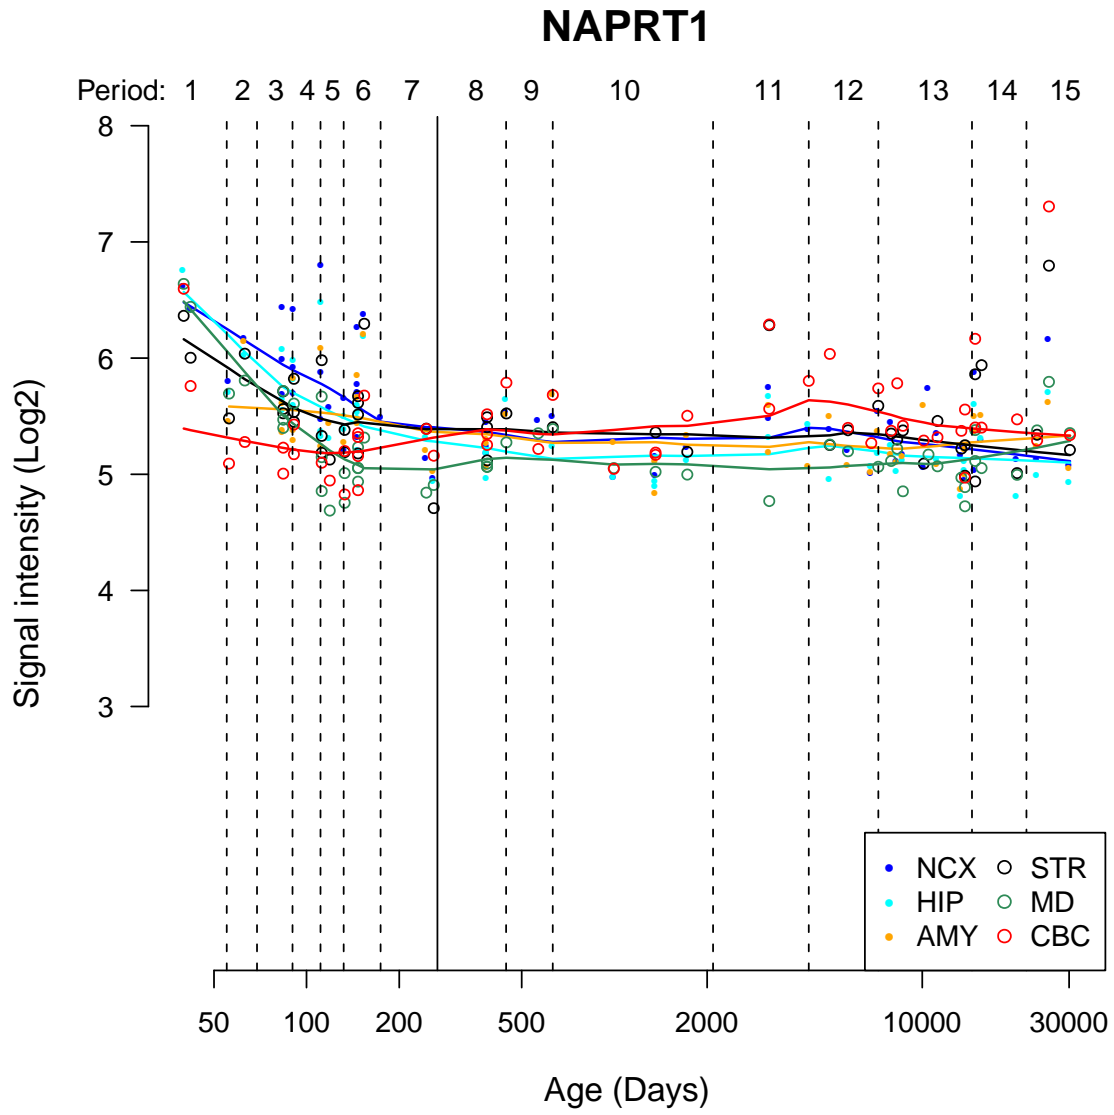



(B)

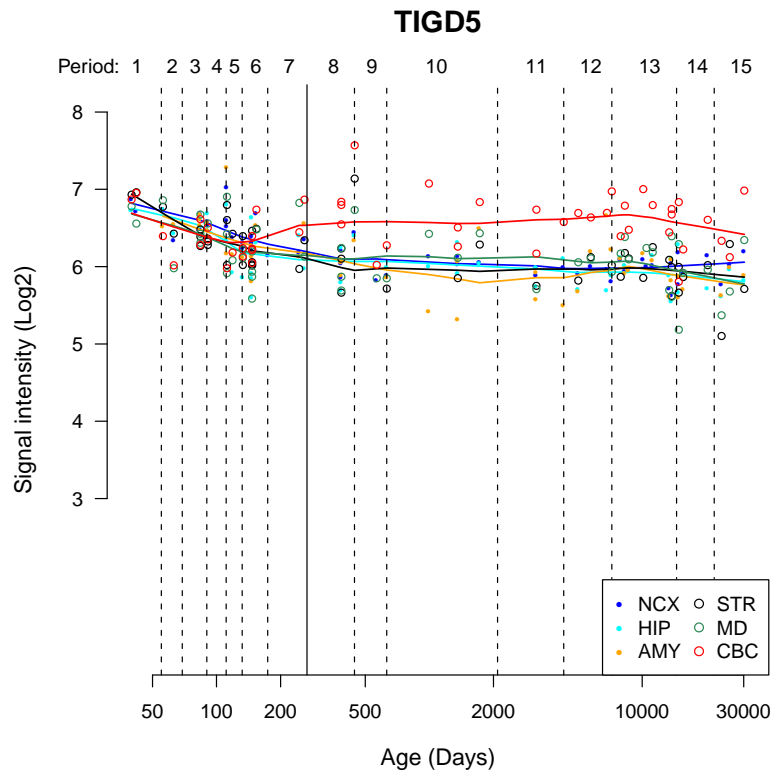

(C)

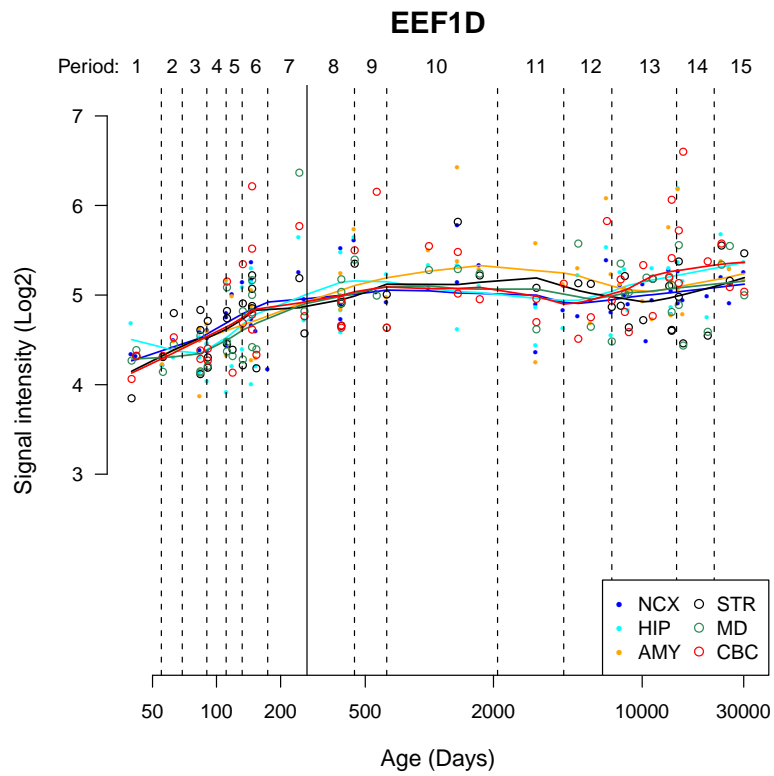

(D)

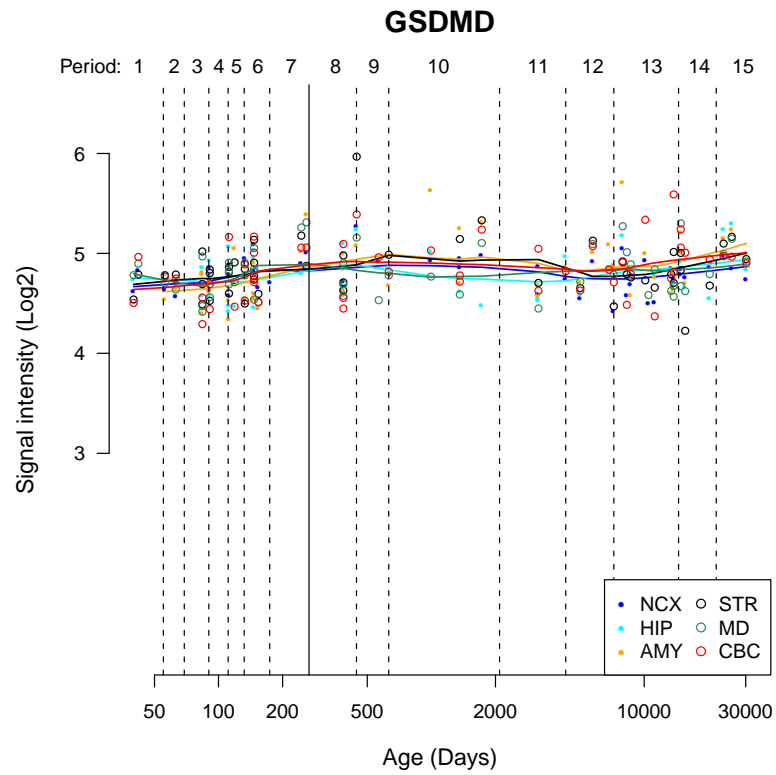

(E)

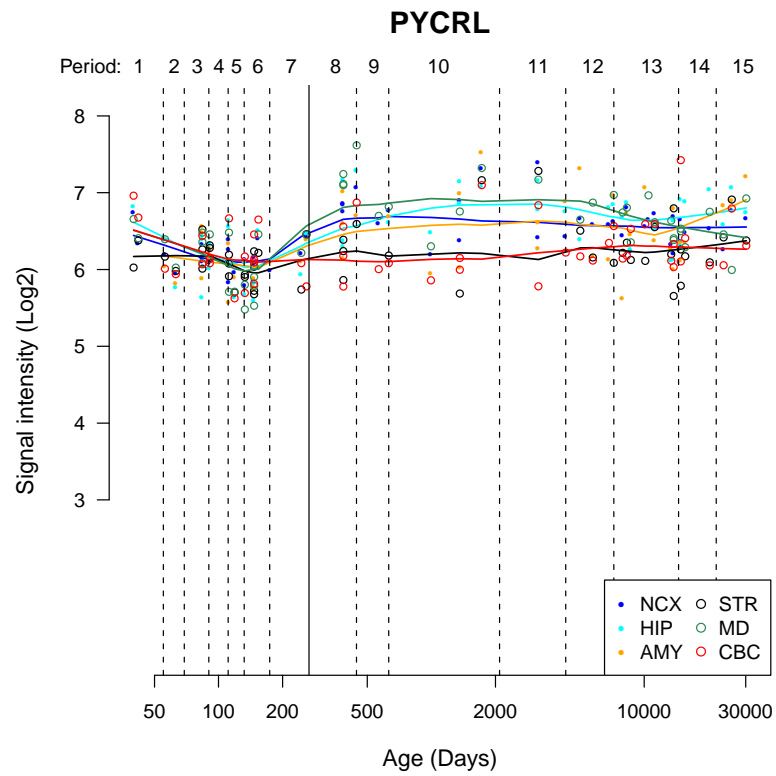

(F)

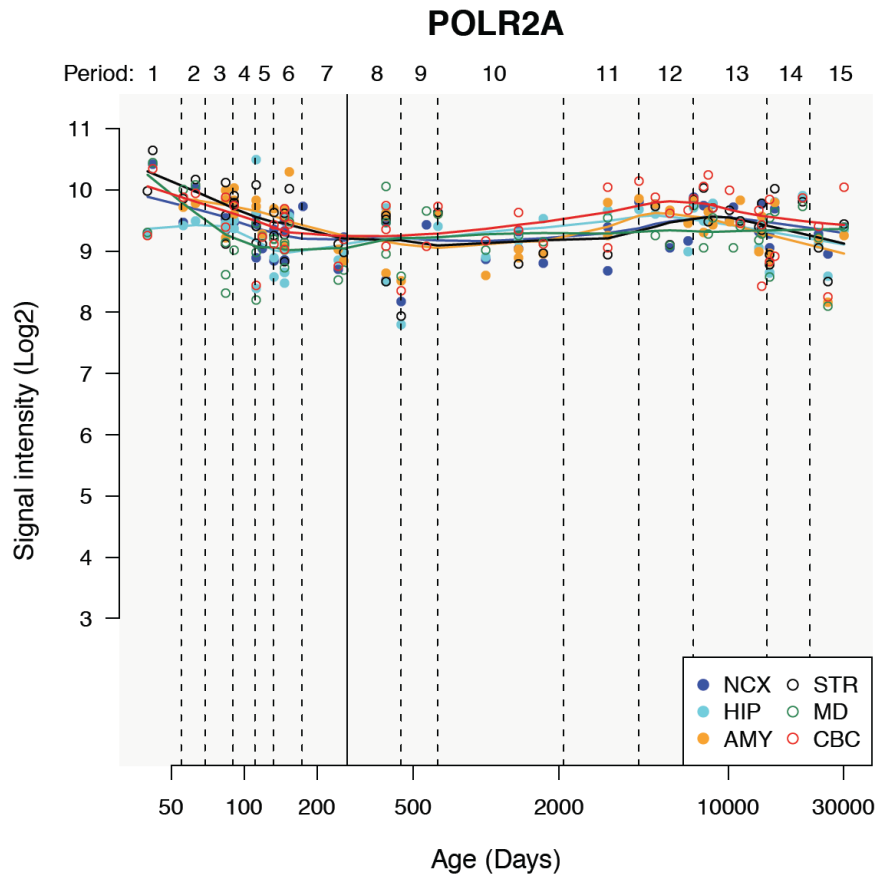

(A) shows the cis-eQTL gene, *NAPRT1*; (B-E) show the other genes in our top locus (defined by  $r^2 > 0.6$ ): *TIGD5*, *EEF1D*, *GSDMD*, *PYCRL* respectively; note that the 6<sup>th</sup> gene in this locus, *MROH6*, is not represented in the Human Brain Transcriptome (HBT) project ([www.hbatlas.org](http://www.hbatlas.org)); (F) depicts *POLR2A*, the most active transcription factor within our locus. Brain regions in these figures include: amygdala (AMY), cerebellar cortex (CBC), hippocampus (HIP), mediodorsal nucleus of the thalamus (MD), neocortex (NCX) and striatum (STR). Periods of human brain development and adulthood include: Embryonic (periods 1), Early fetal (periods 2–3), Early mid-fetal (periods 3–4), Late mid-fetal (periods 6), Late fetal (periods 7), Neonatal and early infancy (periods 8), Late infancy (periods 9), Early childhood (periods 10), Middle and late childhood (periods 11), Adolescence (periods 12), Young adulthood (periods 13), Middle adulthood (periods 14), Late adulthood (periods 15).

**eFigure 16. Worldwide Pattern of Allele Frequencies for Indian Top SNP (rs10866912)**

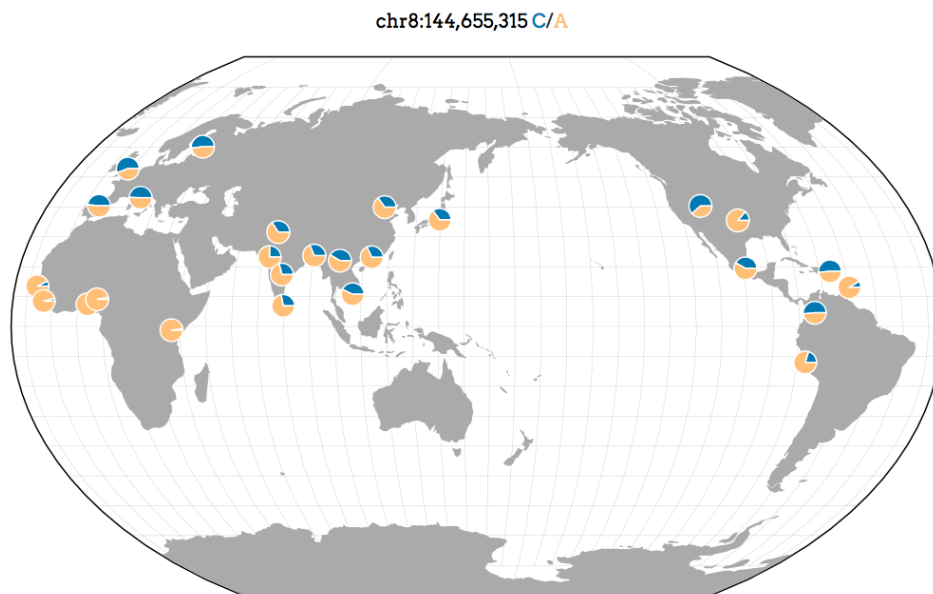

The frequency of the risk allele ("A") is progressively declining from African (~97%) to Indian (~72%) and European (~43%), while the frequency of the protective allele ("C") is increasing across these populations.

## eFigure 17. Natural Selection Analyses Between South Asian and European Populations

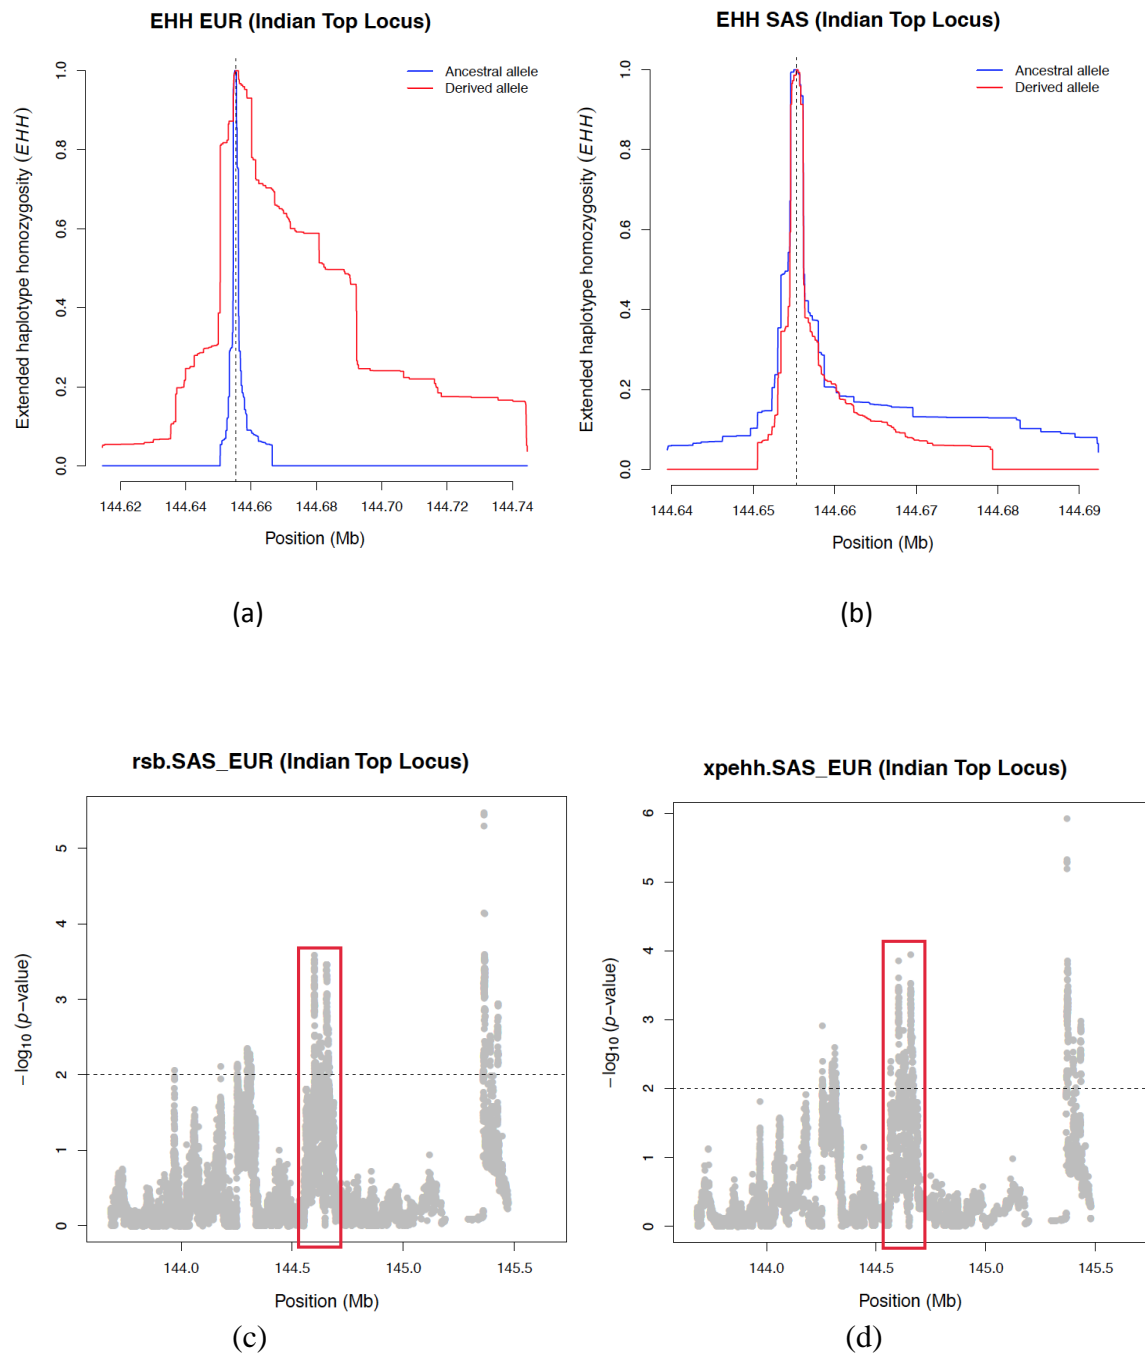

Extended Homozygosity Haplotype(EHH) based test of Indian top locus: (a) In 1000 Genome European populations showing relative decay of the ancestral (risk) and derived (protective) alleles, in which the highly homozygous derived allele is undergoing positive selection; (b) In 1000 Genome South Asian populations showing relative decay of the ancestral (risk) and derived (protective) alleles, in which neither allele is undergoing selection; (c) Rsb analyses (i.e. the observed standardised log-ratio of the integrated EHHs between SAS and European populations) showing a significant peak on chromosome 8q24.3 (144.6 - 144.85Mb) including our top locus indicating that that this region is undergoing selection in Europeans, but not in South Asians; (d) XP-EHH (i.e. cross-population extended haplotype homozygosity test for recent positive selection) analysis of the observed standardised log-ratio of the integrated EHHs between SAS and European populations) showing a significant peak on chromosome 8q24.3 (144.6 - 144.8Mb) including our top locus, indicating that the selective sweep has occurred in Europeans, but not in South Asian populations.

**eFigure 18. Manhattan Plot for Gene-Based Association Using MAGMA Version 1.06**

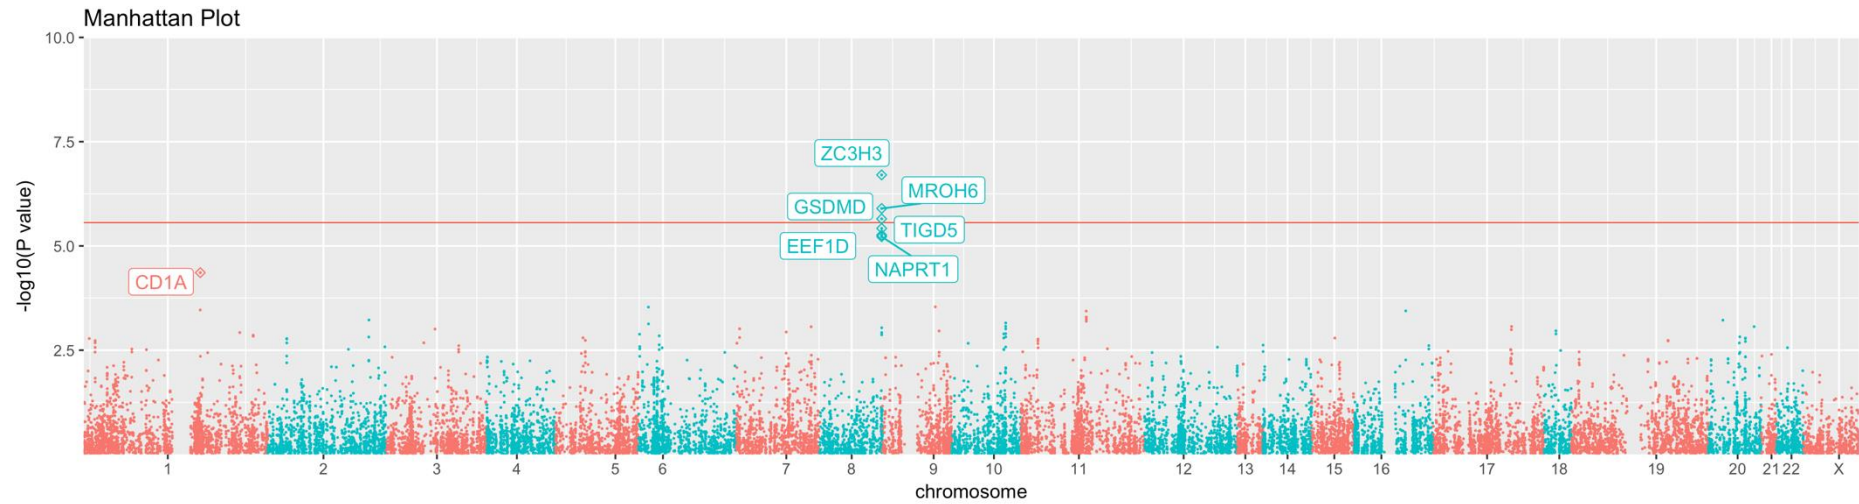

Manhattan plot showing gene-based genome-wide schizophrenia associations in 3092 Indian individuals (1321 cases, 1771 controls). The x-axis shows the chromosomal position and the y-axis the significance of association ( $-\log_{10}P$ ). The horizontal red line represents the level of genome-wide significance ( $5 \times 10^{-6}$ ). Our top genome-wide significant locus is situated on chromosome 8q24.3.

**eFigure 19. Network Connectivity Results for Indian Data Set Using MAGNUM**

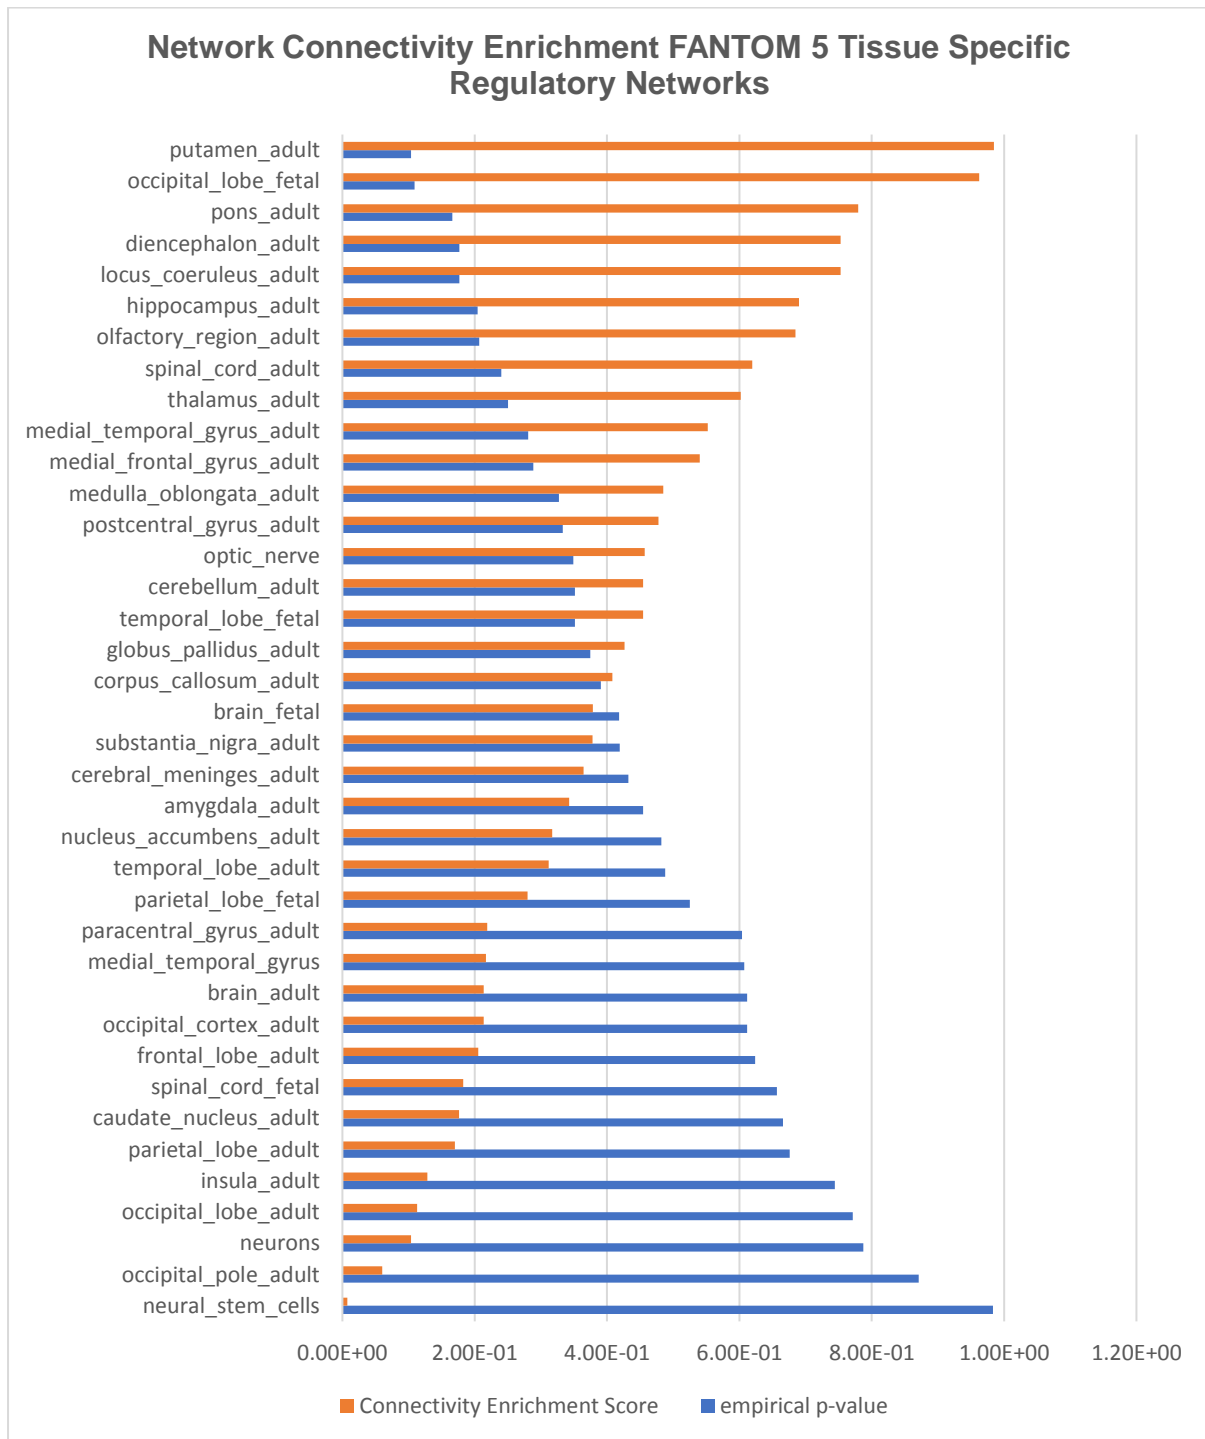

Plot showing brain regions (y-axis) with connectivity enrichment scores and empirical p-values (x-axis). The putamen generated the highest enrichment score, similar to what was observed in the PGC2 schizophrenia data set.

**eFigure 20. Regional Plot of Indian SNP Data Set at PGC2 Top Locus (Chromosome 6p22:28303247-287712247; GRCh37/hg19 Build)**

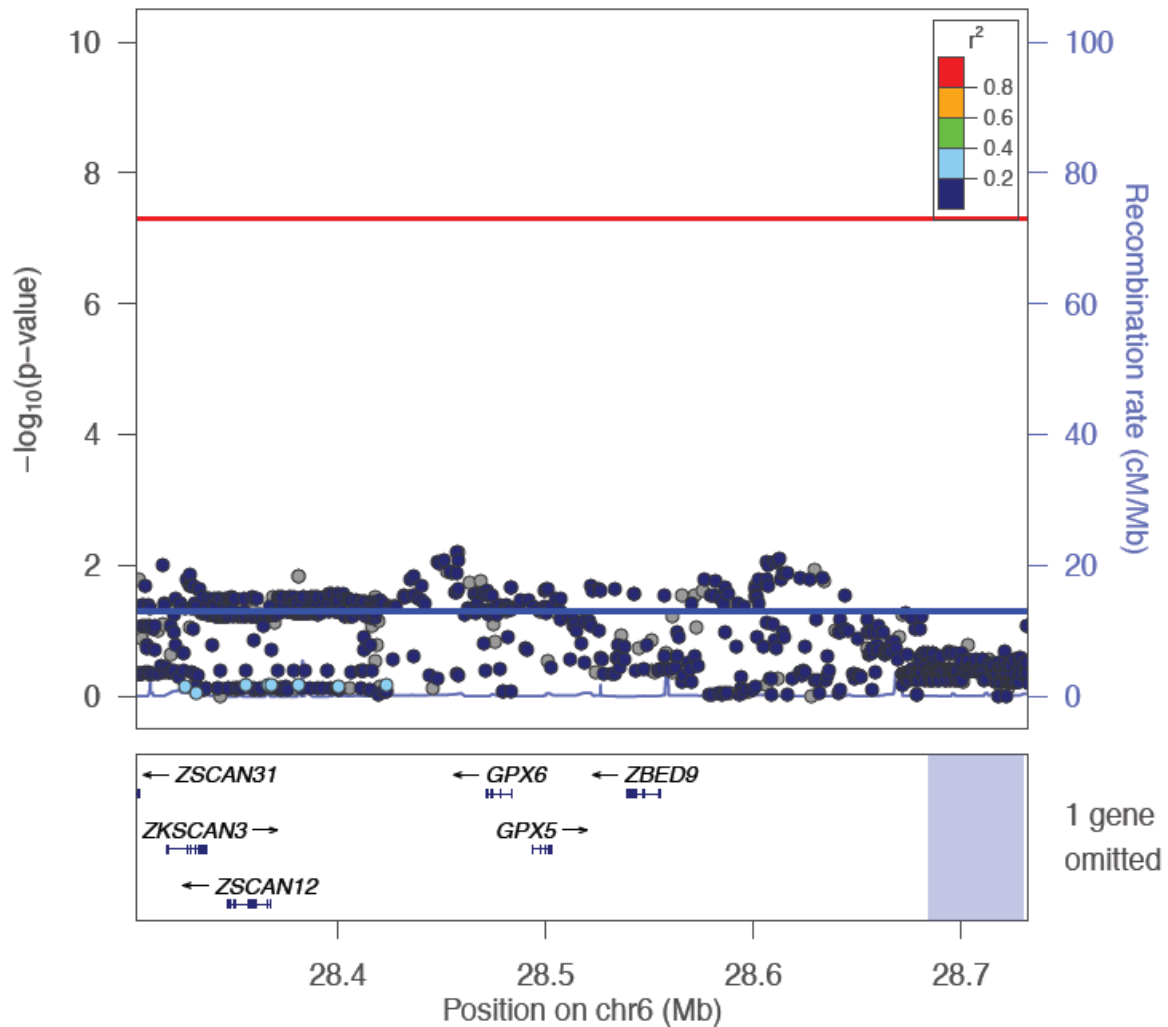

The PGC2 index SNP, chr6:28712247 is located within the 28.7Mb purple band representing the Sri Lankan Tamils in the UK (STU) high LD block ( $r^2 > 0.9$ ; ~48Kb); all other SNPs, coloured in dark blue/light blue are in low LD with the index SNP. The Thousand Genome Phase 3 SAS population was used to calculate LD. The x-axis shows the SNP locus position on chromosome 6. The y-axis shows the significance of association ( $-\log_{10}P$ ). Six genes are located within the PGC2 top locus window, the direction of transcription (upstream/downstream) being annotated with arrows.



**eFigure 21. Regional Plot of Top Replicated PGC2 Locus (Chromosome 2q32.3:193848340-194028340; GRCh37/hg19 Build) in Indian SNP Data Set**

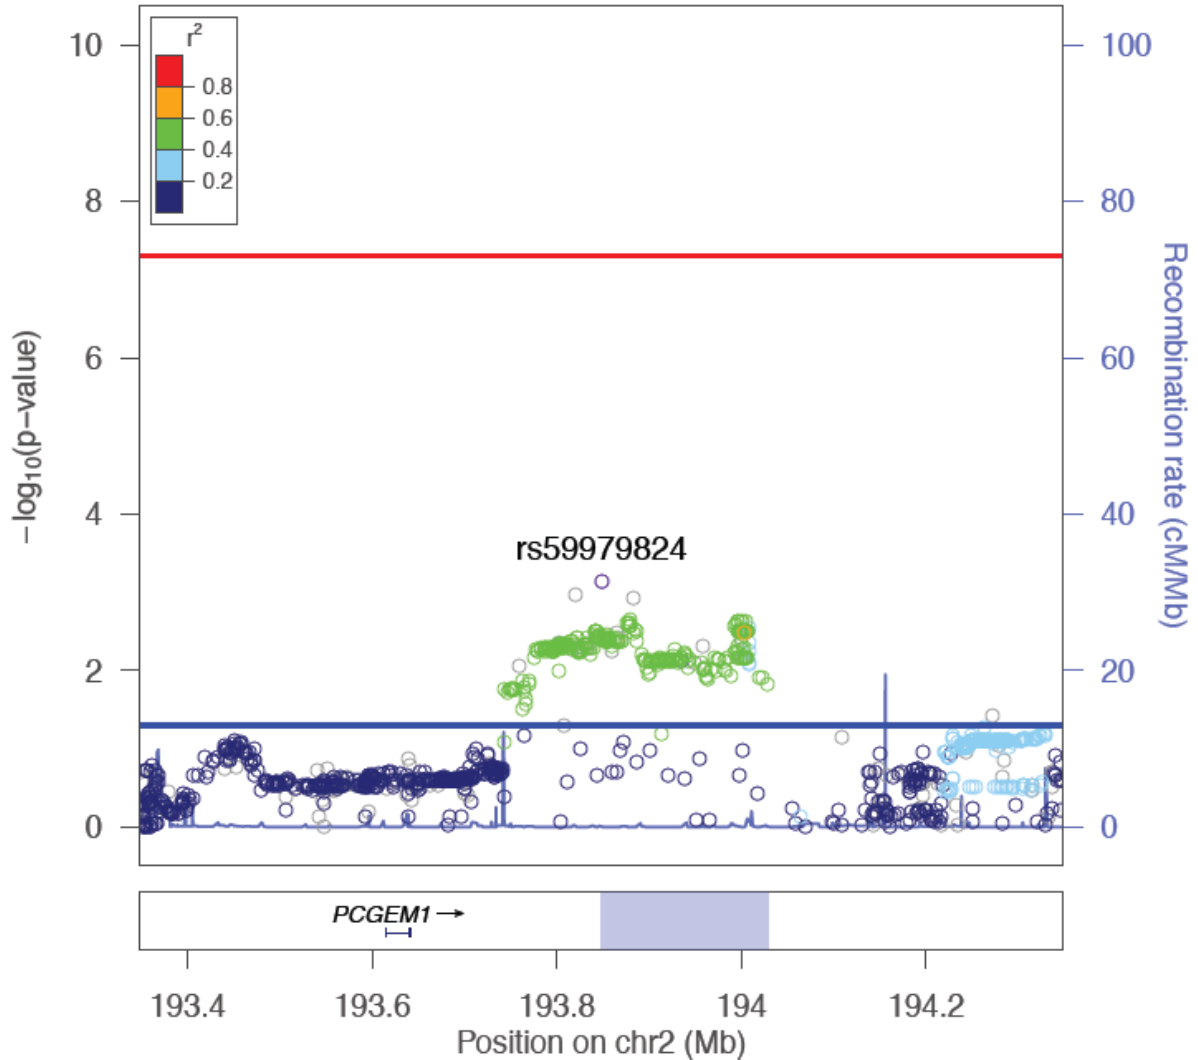

The PGC2 index SNP, rs59979824 is located within the 194Mb purple band representing the Sri Lankan Tamils in the UK (STU) high LD block ( $r^2 > 0.9$ ); all other SNPs are coloured according to the degree of linkage disequilibrium with the index SNP. The Thousand Genome Phase 3 SAS population was used to calculate LD. The x-axis shows the SNP locus position on chromosome 2 (GRCh37/hg19 build). The y-axis shows the significance of association ( $-\log_{10}P$ ). One gene is located upstream of the PGC2/STU locus (purple band), the direction of transcription (upstream/downstream) being annotated with arrows.

**eTable 1. Indian Clinical Data**

| Ethnicity (n=3092)                               |                        |                    |              |
|--------------------------------------------------|------------------------|--------------------|--------------|
| <b>Caste/Relationship</b>                        | <b>Tamil Ethnicity</b> |                    |              |
| <b>Caste</b>                                     | <b>Brahmin</b>         | <b>Non Brahmin</b> | <b>total</b> |
| Cases                                            | 299                    | 977                | 1276         |
| Family Controls                                  | 275                    | 570                | 845          |
| Unrelated Controls                               | 47                     | 834                | 881          |
|                                                  | 621                    | 2381               | 3002         |
| <b>Other South Indian Ethnicity</b>              |                        |                    |              |
| <b>Caste</b>                                     | <b>Brahmin</b>         | <b>Non-Brahmin</b> | <b>total</b> |
| Cases                                            | 23                     | 22                 | 45           |
| Family Controls                                  | 17                     | 23                 | 40           |
| Unrelated Controls                               | 5                      | 0                  | 5            |
|                                                  | 45                     | 45                 | 90           |
| <b>Total</b>                                     | <b>666</b>             | <b>2426</b>        | <b>3092</b>  |
| <b>Degree of consanguinity (Probands n=1231)</b> |                        |                    |              |
| None                                             | NA                     | NA                 | 823          |
| Uncle-niece                                      | NA                     | NA                 | 35           |
| First Cousins                                    | NA                     | NA                 | 27           |
| Second Cousins                                   | NA                     | NA                 | 40           |
| Others/Unknown consanguinity                     | NA                     | NA                 | 68           |
| Information Not Available                        | NA                     | NA                 | 238          |

**eTable 2. Clinical Characteristics**

| <b>Clinical Characteristics (n=1321 Cases)</b> |             |           |
|------------------------------------------------|-------------|-----------|
|                                                | <b>Mean</b> | <b>SD</b> |
| <b>Age at assessment (years)</b>               | 39.08       | 11.42     |
| <b>Age at disease onset (years)</b>            | 25.01       | 8.73      |
| <b>Age at first treatment (years)</b>          | 27.34       | 9.44      |
| <b>Disease duration (years)</b>                | 12.9        | 9.15      |
| <b>Affected individuals</b>                    |             |           |
| <b>Male (Age)</b>                              | 38.4        | 11.1      |
| <b>Female (Age)</b>                            | 39.8        | 11.7      |

**eTable 3. Symptoms and Treatment**

| <b>DSM-IV Symptoms (n=1321)</b>                 |             |                     |             |                 |               |               |                |                  |
|-------------------------------------------------|-------------|---------------------|-------------|-----------------|---------------|---------------|----------------|------------------|
| <b>Symptoms (%)</b>                             | <b>None</b> | <b>Questionable</b> | <b>Mild</b> | <b>Moderate</b> | <b>Marked</b> | <b>Severe</b> | <b>Unknown</b> | <b>Total (%)</b> |
| <b>Affective Flattening or Blunting (Neg)</b>   | 44          | 3.40                | 11.80       | 21.90           | 13.00         | 2.90          | 3.40           | 100              |
| <b>Alogia (Neg)</b>                             | 63          | 2.10                | 9.10        | 10.90           | 11.80         | 0.8           | 2.40           | 100              |
| <b>Avolition/Apathy (Neg)</b>                   | 24          | 1.70                | 13.60       | 22.20           | 28.00         | 7.30          | 3.00           | 100              |
| <b>Anhedonia/Asociality (Neg)</b>               | 22          | 1.90                | 12.20       | 27.80           | 25.20         | 7.30          | 3.50           | 100              |
| <b>Hallucinations (Pos)</b>                     | 46          | 6.00                | 9.60        | 18.00           | 10.90         | 4.00          | 5.30           | 100              |
| <b>Delusions (Pos)</b>                          | 25          | 6.00                | 8.50        | 23.30           | 21.70         | 6.90          | 8.20           | 100              |
| <b>Bizarre Behavior (Pos)</b>                   | 69          | 2.20                | 8.80        | 10.20           | 4.60          | 1.60          | 3.90           | 100              |
| <b>Formal Thought Disorder (Pos)</b>            | 78          | 3.30                | 6.50        | 5.20            | 3.00          | 0.70          | 3.00           | 100              |
| <b>Treatment status at recruitment (n=1321)</b> |             |                     |             |                 |               |               |                |                  |
| <b>On Treatment</b>                             | NA          | NA                  | NA          | NA              | NA            | NA            | NA             | 88.40            |
| <b>Once Treated (discontinued Treatment)</b>    | NA          | NA                  | NA          | NA              | NA            | NA            | NA             | 8.30             |
| <b>Never Treated</b>                            | NA          | NA                  | NA          | NA              | NA            | NA            | NA             | 3.30             |

Neg: Negative symptoms; Pos: Positive symptoms

**eTable 4. Forward and Reverse Primer Sequences for DRE-NAPRT1 mRNA**

| <b>Oligos Name</b>    | <b>Oligos sequence</b>                                                    | <b>Mature</b>              |
|-----------------------|---------------------------------------------------------------------------|----------------------------|
| NAPRT1-01a            | TGCTGTAAAGGAGATGCAGGAATTTTC<br>GTTTTGGCCACTGACTGACGAAATTC<br>CCATCTCCTTTA | TAAAGGAGATGCAG<br>GAATTTTC |
| NAPRT1-01b            | CCTGTAAAGGAGATGGGAATTTTCGTC<br>AGTCAGTGGCCAAAACGAAATTCCTG<br>CATCTCCTTTAC |                            |
| NAPRT1-02a            | TGCTGTCTAGATTCATGGTTGAGACT<br>GTTTTGGCCACTGACTGACAGTCTCA<br>AATGAATCTAGA  | TCTAGATTCATGGTT<br>GAGACT  |
| NAPRT1-02b            | CCTGTCTAGATTCATTTGAGACTGTC<br>AGTCAGTGGCCAAAACAGTCTCAAC<br>CATGAATCTAGAC  |                            |
| NAPRT1-03a            | TGCTGAATCCAGCATCTCTGCATCTG<br>GTTTTGGCCACTGACTGACCAGATG<br>CAGATGCTGGATT  | GAATCCAGCATCTC<br>TGCATCTG |
| NAPRT1-03b            | CCTGAATCCAGCATCTGCATCTGGTC<br>AGTCAGTGGCCAAAACCAGATGCAG<br>AGATGCTGGATTC  |                            |
| NAPRT1-04a            | TGCTGAGCACAGTGAATCCAGCATCT<br>GTTTTGGCCACTGACTGACAGATGCT<br>GTTCACTGTGCT  | AGCACAGTGAATCC<br>AGCATCT  |
| NAPRT1-04b            | CCTGAGCACAGTGAACAGCATCTGT<br>CAGTCAGTGGCCAAAACAGATGCTG<br>GATTCACTGTGCTC  |                            |
| dreNAPRT1-<br>Forward | GGGgacaagtttgtagAAAAAagcaggctAT<br>GGCGACAAGTAACGAAGC                     |                            |
| dreNAPRT1-<br>Reverse | GGGgaccacTTTGTaagaaagctgggtT<br>CAGTTGGACAGCAGGAAGT                       |                            |

**eTable 5. Study Population Haplotypes Present in Our Top Locus**

| SNP                      | Haplotype A | Haplotype B | Haplotype C | Haplotype D |
|--------------------------|-------------|-------------|-------------|-------------|
| rs58774517               | T           | C           | C           | T           |
| rs1869434                | G           | G           | A           | G           |
| rs4606077                | G           | A           | A           | G           |
| rs4873805                | G           | A           | G           | G           |
| rs12546272               | A           | G           | G           | A           |
| rs367672647              | -           | +           | +           | -           |
| rs10866912               | A           | A           | A           | C           |
| Population frequency (%) | 31.1        | 22.0        | 18.9        | 26.8        |

Four distinct haplotypes in our top locus situated between the *MROH6* and *NAPRT1* genes on chromosome 8, covering 98.8% of the alleles present in the study population. Haplotypes differed at 6 SNPs and one indel. The risk allele (A) of rs10866912 was present in haplotypes A, B, and C, while the protective allele (C) of our index SNP was present in Haplotype D.

**eTable 6. Imputation Batch-Based Meta-analysis for Top Indian Locus**

| SNP        | A1 | A2 | Freq   | Effect  | SE     | P-value  | OR   |
|------------|----|----|--------|---------|--------|----------|------|
| rs10866912 | a  | c  | 0.7231 | 0.0585  | 0.0117 | 3.53E-07 | 1.27 |
| rs10866911 | a  | g  | 0.2697 | -0.0586 | 0.0119 | 5.04E-07 | 0.79 |
| rs4873803  | t  | g  | 0.2693 | -0.0586 | 0.0118 | 4.90E-07 | 0.79 |
| rs4873804  | c  | g  | 0.2703 | -0.0578 | 0.0118 | 6.82E-07 | 0.79 |

**eTable 7. Transethnic Meta-analysis Results for Indian Top Locus With PGC2 Using Metasoft-RE2C**

| SNP ID     | LS P-value | Heterogeneity statistic | RE2C P-value |
|------------|------------|-------------------------|--------------|
| rs4873803  | 1.70E-06   | 94                      | 1.49E-09     |
| rs10866911 | 2.35E-06   | 94                      | 1.93E-09     |
| rs10866912 | 4.28E-06   | 95                      | 2.09E-09     |
| rs4873804  | 2.34E-06   | 94                      | 2.26E-09     |
| rs2305492  | 8.33E-05   | 93                      | 6.20E-07     |
| rs4292703  | 0.00011498 | 93                      | 7.03E-07     |
| rs7034361  | 0.66104456 | 96                      | 4.60E-06     |
| rs16998895 | 0.00315589 | 93                      | 1.05E-05     |
| rs35043390 | 0.00347417 | 93                      | 1.60E-05     |
| rs12199670 | 0.61251295 | 95                      | 2.77E-05     |
| rs4776288  | 0.37430489 | 95                      | 8.17E-05     |

LS P-value: Lin-Sullivan p-value; FE: Fixed Effect; RE2C P-value: Optimized Random Effect p-value; Notably all SNPs in the Indian top locus have high heterogeneity statistic (>65), indicating that these SNPs are heterogeneous between PGC2 and Indian data sets (i.e. having different allelic effects, allele frequencies, and differences in linkage disequilibrium)

**eTable 8. Transethnic Meta-analysis Results for 108 PGC2 Significant Regions Using Metasoft-RE2C**

| Rank | <i>P</i> value          | Position (hg19)           | SNP ID     | Chr | BP        | Meta <i>P</i> value     | Is more significant |
|------|-------------------------|---------------------------|------------|-----|-----------|-------------------------|---------------------|
| 1    | 3.48 ×10 <sup>-31</sup> | chr6:28303247-28712247    | rs7766356  | 6   | 28400538  | 3.48 ×10 <sup>-21</sup> | FALSE               |
| 2    | 3.36 ×10 <sup>-19</sup> | chr1:97792625-98559084    | rs1702294  | 1   | 98501984  | 1.10 ×10 <sup>-17</sup> | FALSE               |
| 3    | 6.20 ×10 <sup>-19</sup> | chr10:104423800-105165583 | rs12244388 | 10  | 104640052 | 2.04 ×10 <sup>-18</sup> | FALSE               |
| 4    | 3.22 ×10 <sup>-18</sup> | chr12:2321860-2523731     | rs2007044  | 12  | 2344960   | 9.10 ×10 <sup>-18</sup> | FALSE               |
| 5    | 1.74 ×10 <sup>-15</sup> | chr8:143309503-143330533  | rs4129585  | 8   | 143312933 | 7.36 ×10 <sup>-13</sup> | FALSE               |
| 6    | 7.98 ×10 <sup>-15</sup> | chr4:103146888-103198090  | rs13150344 | 4   | 103170124 | 4.83 ×10 <sup>-05</sup> | FALSE               |
| 7    | 8.20 ×10 <sup>-15</sup> | chr7:1896096-2190096      | rs58120505 | 7   | 2029867   | 7.61 ×10 <sup>-14</sup> | FALSE               |
| 8    | 1.10 ×10 <sup>-14</sup> | chr5:60499143-60843543    | rs4391122  | 5   | 60598543  | 1.36 ×10 <sup>-13</sup> | FALSE               |
| 9    | 1.86 ×10 <sup>-14</sup> | chr12:123448113-123909113 | rs7299943  | 12  | 123593485 | 1.98 ×10 <sup>-08</sup> | FALSE               |
| 10   | 5.65 ×10 <sup>-14</sup> | chr2:200715237-200848037  | rs11693528 | 2   | 200736507 | 2.53 ×10 <sup>-14</sup> | TRUE                |
| 11   | 8.30 ×10 <sup>-14</sup> | chr15:91416560-91429040   | rs4702     | 15  | 91426560  | 1.86 ×10 <sup>-11</sup> | FALSE               |
| 12   | 1.05 ×10 <sup>-13</sup> | chr3:36843183-36945783    | rs75968099 | 3   | 36858583  | 2.33 ×10 <sup>-13</sup> | FALSE               |
| 13   | 1.36 ×10 <sup>-13</sup> | chr14:103996234-104184834 | rs12887734 | 14  | 104046834 | 1.86 ×10 <sup>-13</sup> | FALSE               |
| 14   | 2.44 ×10 <sup>-13</sup> | chr15:78803032-78926732   | rs8043009  | 15  | 78908154  | 3.06 ×10 <sup>-12</sup> | FALSE               |
| 15   | 3.03 ×10 <sup>-13</sup> | chr7:110843815-111205915  | rs13240464 | 7   | 110898915 | 2.01 ×10 <sup>-12</sup> | FALSE               |
| 16   | 1.09 ×10 <sup>-12</sup> | chr11:130714610-130749330 | rs10750450 | 11  | 130719061 | 7.20 ×10 <sup>-13</sup> | TRUE                |
| 17   | 1.53 ×10 <sup>-12</sup> | chr2:185601420-185785420  | rs11693094 | 2   | 185601420 | 3.41 ×10 <sup>-11</sup> | FALSE               |
| 18   | 1.61 ×10 <sup>-12</sup> | chrX:21193266-21570266    | rs6528018  | X   | 21413018  | 3.84 ×10 <sup>-01</sup> | FALSE               |
| 19   | 1.97 ×10 <sup>-12</sup> | chr10:18681005-18770105   | rs17691888 | 10  | 18734528  | 7.44 ×10 <sup>-11</sup> | FALSE               |
| 20   | 2.02 ×10 <sup>-12</sup> | chr12:57428314-57682971   | rs11172142 | 12  | 57680101  | 1.21 ×10 <sup>-03</sup> | FALSE               |
| 21   | 2.03 ×10 <sup>-12</sup> | chr1:73766426-73991366    | rs12129573 | 1   | 73768366  | 7.38 ×10 <sup>-10</sup> | FALSE               |
| 22   | 2.32 ×10 <sup>-12</sup> | chr2:233559301-233753501  | rs778371   | 2   | 233743109 | 4.53 ×10 <sup>-12</sup> | FALSE               |
| 23   | 2.80 ×10 <sup>-12</sup> | chr11:124610007-124620147 | rs55661361 | 11  | 124613957 | 4.05 ×10 <sup>-12</sup> | FALSE               |
| 24   | 3.34 ×10 <sup>-12</sup> | chr18:52747686-53200117   | rs9636107  | 18  | 53200117  | 1.22 ×10 <sup>-12</sup> | TRUE                |
| 25   | 1.26 ×10 <sup>-11</sup> | chr11:46342943-46751213   | rs7951870  | 11  | 46373311  | 9.35 ×10 <sup>-11</sup> | FALSE               |
| 26   | 1.30 ×10 <sup>-11</sup> | chr3:180588843-181205585  | rs34796896 | 3   | 180623255 | 1.17 ×10 <sup>-10</sup> | FALSE               |
| 27   | 1.46 ×10 <sup>-11</sup> | chr20:37361494-37485994   | rs6065094  | 20  | 37453194  | 5.25 ×10 <sup>-12</sup> | TRUE                |

| Rank | <i>P</i> value          | Position (hg19)           | SNP ID     | Chr | BP        | Meta <i>P</i> value     | Is more significant |
|------|-------------------------|---------------------------|------------|-----|-----------|-------------------------|---------------------|
| 28   | 1.47 ×10 <sup>-11</sup> | chr2:57943593-58502192    | rs11682175 | 2   | 57987593  | 3.60 ×10 <sup>-12</sup> | TRUE                |
| 29   | 1.62 ×10 <sup>-11</sup> | chr15:84661161-85153461   | rs66486766 | 15  | 84806060  | 5.03 ×10 <sup>-11</sup> | FALSE               |
| 30   | 1.97 ×10 <sup>-11</sup> | chr18:53453389-53804154   | rs7235891  | 18  | 53454774  | 1.29 ×10 <sup>-08</sup> | FALSE               |
| 31   | 2.06 ×10 <sup>-11</sup> | chr2:198148577-198835577  | rs2565164  | 2   | 198337520 | 1.79 ×10 <sup>-11</sup> | TRUE                |
| 32   | 2.07 ×10 <sup>-11</sup> | chr22:41408556-41675156   | rs9607782  | 22  | 41587556  | 4.43 ×10 <sup>-13</sup> | TRUE                |
| 33   | 2.61 ×10 <sup>-11</sup> | chr8:111460061-111630761  | rs4642619  | 8   | 111487468 | 7.50 ×10 <sup>-11</sup> | FALSE               |
| 34   | 2.69 ×10 <sup>-11</sup> | chr3:2532786-2561686      | rs17194490 | 3   | 2547786   | 5.25 ×10 <sup>-11</sup> | FALSE               |
| 35   | 2.75 ×10 <sup>-11</sup> | chr11:113317794-113423994 | rs2514218  | 11  | 113392994 | 8.50 ×10 <sup>-10</sup> | FALSE               |
| 36   | 3.87 ×10 <sup>-11</sup> | chr11:133808069-133852969 | rs502834   | 11  | 133817333 | 7.22 ×10 <sup>-07</sup> | FALSE               |
| 37   | 4.26 ×10 <sup>-11</sup> | chr3:52541105-52903405    | rs2535627  | 3   | 52845105  | 7.52 ×10 <sup>-11</sup> | FALSE               |
| 38   | 4.55 ×10 <sup>-11</sup> | chr16:29924377-30144877   | rs12691307 | 16  | 29939877  | 3.67 ×10 <sup>-10</sup> | FALSE               |
| 39   | 4.73 ×10 <sup>-11</sup> | chr22:39975317-40016817   | rs926231   | 22  | 40006986  | 2.22 ×10 <sup>-11</sup> | TRUE                |
| 40   | 7.26 ×10 <sup>-11</sup> | chr3:135807405-136615405  | rs7427564  | 3   | 136274435 | 1.63 ×10 <sup>-11</sup> | TRUE                |
| 41   | 1.06 ×10 <sup>-10</sup> | chr5:151941104-152797656  | rs2910032  | 5   | 152540354 | 1.57 ×10 <sup>-09</sup> | FALSE               |
| 42   | 1.98 ×10 <sup>-10</sup> | chrX:68377126-68379036    | rs5936660  | X   | 68377937  | 8.67 ×10 <sup>-07</sup> | FALSE               |
| 43   | 2.86 ×10 <sup>-10</sup> | chr17:2095899-2220799     | rs4523957  | 17  | 2208899   | 2.64 ×10 <sup>-09</sup> | FALSE               |
| 44   | 3.33 ×10 <sup>-10</sup> | chr7:86403226-86459326    | rs12704290 | 7   | 86427626  | 1.64 ×10 <sup>-11</sup> | TRUE                |
| 45   | 3.38 ×10 <sup>-10</sup> | chr15:61831663-61909663   | rs35225048 | 15  | 61856263  | 7.08 ×10 <sup>-10</sup> | FALSE               |
| 46   | 3.39 ×10 <sup>-10</sup> | chr1:44029384-44128084    | rs11210892 | 1   | 44100084  | 2.03 ×10 <sup>-11</sup> | TRUE                |
| 47   | 3.63 ×10 <sup>-10</sup> | chr19:19374022-19658022   | rs2905426  | 19  | 19478022  | 9.49 ×10 <sup>-10</sup> | FALSE               |
| 48   | 4.49 ×10 <sup>-10</sup> | chr1:149998890-150242490  | rs11578204 | 1   | 150001721 | 3.46 ×10 <sup>-03</sup> | FALSE               |
| 49   | 8.15 ×10 <sup>-10</sup> | chr6:84279922-84407274    | rs3798869  | 6   | 84328660  | 1.16 ×10 <sup>-10</sup> | TRUE                |
| 50   | 8.70 ×10 <sup>-10</sup> | chr1:2372401-2402501      | rs4648845  | 1   | 2387101   | 5.78 ×10 <sup>-09</sup> | FALSE               |
| 51   | 1.01 ×10 <sup>-09</sup> | chr16:13728459-13761359   | rs7405404  | 16  | 13749859  | 4.71 ×10 <sup>-10</sup> | TRUE                |
| 52   | 1.13 ×10 <sup>-09</sup> | chr7:104598064-105063064  | rs6466055  | 7   | 104929064 | 1.48 ×10 <sup>-09</sup> | FALSE               |
| 53   | 1.17 ×10 <sup>-09</sup> | chr1:8411184-8638984      | rs301797   | 1   | 8487323   | 2.09 ×10 <sup>-12</sup> | TRUE                |
| 54   | 1.40 ×10 <sup>-09</sup> | chr12:110723245-110723245 | NA         | NA  | NA        | NA                      | NA                  |
| 55   | 1.47 ×10 <sup>-09</sup> | chr4:170357552-170646052  | rs12647126 | 4   | 170376705 | 3.17 ×10 <sup>-08</sup> | FALSE               |
| 56   | 1.64 ×10 <sup>-09</sup> | chr6:96459651-96459651    | NA         | NA  | NA        | NA                      | NA                  |



| Rank | <i>P</i> value          | Position (hg19)           | SNP ID     | Chr | BP        | Meta <i>P</i> value     | Is more significant |
|------|-------------------------|---------------------------|------------|-----|-----------|-------------------------|---------------------|
| 57   | 1.71 ×10 <sup>-09</sup> | chr22:42315744-42689414   | rs6002655  | 22  | 42603814  | 1.87 ×10 <sup>-09</sup> | FALSE               |
| 58   | 1.81 ×10 <sup>-09</sup> | chr2:146416922-146441832  | rs6430095  | 2   | 146439945 | 2.55 ×10 <sup>-09</sup> | FALSE               |
| 59   | 2.24 ×10 <sup>-09</sup> | chr11:57386294-57682294   | rs9420     | 11  | 57510294  | 7.48 ×10 <sup>-08</sup> | FALSE               |
| 60   | 2.55 ×10 <sup>-09</sup> | chr11:24367320-24412990   | rs12363019 | 11  | 24374545  | 3.21 ×10 <sup>-09</sup> | FALSE               |
| 61   | 2.86 ×10 <sup>-09</sup> | chr1:30412551-30437271    | rs1498232  | 1   | 30433951  | 1.29 ×10 <sup>-09</sup> | TRUE                |
| 62   | 3.28 ×10 <sup>-09</sup> | chr7:137039644-137085244  | rs3735025  | 7   | 137074844 | 9.73 ×10 <sup>-09</sup> | FALSE               |
| 63   | 3.61 ×10 <sup>-09</sup> | chr9:84630941-84813641    | rs11139497 | 9   | 84739941  | 3.00 ×10 <sup>-09</sup> | TRUE                |
| 64   | 3.73 ×10 <sup>-09</sup> | chr1:243503719-244002945  | rs10803138 | 1   | 243555219 | 2.38 ×10 <sup>-08</sup> | FALSE               |
| 65   | 4.18 ×10 <sup>-09</sup> | chr15:40566759-40602237   | rs56282503 | 15  | 40566759  | 3.12 ×10 <sup>-07</sup> | FALSE               |
| 66   | 4.49 ×10 <sup>-09</sup> | chr19:30981643-31039023   | rs2053079  | 19  | 30987423  | 2.29 ×10 <sup>-09</sup> | TRUE                |
| 67   | 4.61 ×10 <sup>-09</sup> | chr5:88581331-88854331    | rs62378245 | 5   | 88743962  | 1.22 ×10 <sup>-08</sup> | FALSE               |
| 68   | 4.64 ×10 <sup>-09</sup> | chr3:17221366-17888266    | rs4908972  | 3   | 17796192  | 8.38 ×10 <sup>-09</sup> | FALSE               |
| 69   | 4.67 ×10 <sup>-09</sup> | chr5:137598121-137948092  | rs3849046  | 5   | 137851192 | 2.12 ×10 <sup>-09</sup> | TRUE                |
| 70   | 4.80 ×10 <sup>-09</sup> | chr14:99707919-99719219   | rs2693698  | 14  | 99719219  | 5.13 ×10 <sup>-08</sup> | FALSE               |
| 71   | 4.86 ×10 <sup>-09</sup> | chr14:72417326-72450526   | rs2332700  | 14  | 72417326  | 1.35 ×10 <sup>-09</sup> | TRUE                |
| 72   | 5.05 ×10 <sup>-09</sup> | chr5:45291475-45393775    | rs9292918  | 5   | 45301035  | 6.46 ×10 <sup>-08</sup> | FALSE               |
| 73   | 5.97 ×10 <sup>-09</sup> | chr8:60475469-60954469    | rs6984242  | 8   | 60700469  | 1.27 ×10 <sup>-09</sup> | TRUE                |
| 74   | 7.39 ×10 <sup>-09</sup> | chr2:72357335-72368185    | rs55707322 | 2   | 72358959  | 2.84 ×10 <sup>-03</sup> | FALSE               |
| 75   | 7.54 ×10 <sup>-09</sup> | chr11:123394636-123395986 | rs7927176  | 11  | 123395864 | 1.58 ×10 <sup>-08</sup> | FALSE               |
| 76   | 8.33 ×10 <sup>-09</sup> | chr2:200161422-200309252  | rs6704641  | 2   | 200164252 | 3.64 ×10 <sup>-08</sup> | FALSE               |
| 77   | 8.41 ×10 <sup>-09</sup> | chr2:193848340-194028340  | rs59979824 | 2   | 193848340 | 2.69 ×10 <sup>-10</sup> | TRUE                |
| 78   | 9.47 ×10 <sup>-09</sup> | chr4:176851001-176875801  | rs1106568  | 4   | 176861301 | 1.19 ×10 <sup>-08</sup> | FALSE               |
| 79   | 1.06 ×10 <sup>-08</sup> | chr8:4177794-4192544      | rs10046758 | 8   | 4184170   | 8.60 ×10 <sup>-08</sup> | FALSE               |
| 80   | 1.12 ×10 <sup>-08</sup> | chr2:225334096-225467796  | rs11685299 | 2   | 225391296 | 1.38 ×10 <sup>-08</sup> | FALSE               |
| 81   | 1.22 ×10 <sup>-08</sup> | chr8:89340626-89753626    | rs6990941  | 8   | 89644431  | 1.78 ×10 <sup>-08</sup> | FALSE               |
| 82   | 1.28 ×10 <sup>-08</sup> | chr16:9875519-9970219     | rs7191183  | 16  | 9900057   | 1.57 ×10 <sup>-08</sup> | FALSE               |
| 83   | 1.41 ×10 <sup>-08</sup> | chr14:30189985-30190316   | rs2068012  | 14  | 30190316  | 3.39 ×10 <sup>-07</sup> | FALSE               |
| 84   | 1.43 ×10 <sup>-08</sup> | chr3:63792650-64004050    | rs704364   | 3   | 63874734  | 7.48 ×10 <sup>-08</sup> | FALSE               |
| 85   | 1.51 ×10 <sup>-08</sup> | chr16:67709340-68311340   | rs9928653  | 16  | 68252079  | 6.83 ×10 <sup>-08</sup> | FALSE               |

| Rank | <i>P</i> value          | Position (hg19)           | SNP ID     | Chr | BP        | Meta <i>P</i> value     | Is more significant |
|------|-------------------------|---------------------------|------------|-----|-----------|-------------------------|---------------------|
| 86   | 1.59 ×10 <sup>-08</sup> | chr2:149390778-149520178  | rs12614977 | 2   | 149510282 | 1.72 ×10 <sup>-04</sup> | FALSE               |
| 87   | 1.77 ×10 <sup>-08</sup> | chr17:17722402-18030202   | rs8082590  | 17  | 17958402  | 3.13 ×10 <sup>-08</sup> | FALSE               |
| 88   | 1.79 ×10 <sup>-08</sup> | chr15:70573672-70628872   | rs1355585  | 15  | 70586617  | 6.72 ×10 <sup>-08</sup> | FALSE               |
| 89   | 1.87 ×10 <sup>-08</sup> | chr16:58669293-58682833   | rs12325245 | 16  | 58681393  | 4.75 ×10 <sup>-09</sup> | TRUE                |
| 90   | 2.10 ×10 <sup>-08</sup> | chr8:27412627-27453627    | rs59724122 | 8   | 27424696  | 8.15 ×10 <sup>-08</sup> | FALSE               |
| 91   | 2.21 ×10 <sup>-08</sup> | chrX:5916533-6032733      | rs73627050 | X   | 6012628   | 7.02 ×10 <sup>-06</sup> | FALSE               |
| 92   | 2.69 ×10 <sup>-08</sup> | chr6:73132701-73171901    | rs1339227  | 6   | 73155701  | 1.43 ×10 <sup>-07</sup> | FALSE               |
| 93   | 2.85 ×10 <sup>-08</sup> | chr7:24619494-24832094    | rs12154597 | 7   | 24785882  | 6.66 ×10 <sup>-07</sup> | FALSE               |
| 94   | 3.05 ×10 <sup>-08</sup> | chr5:109030036-109209066  | rs71575306 | 5   | 109046210 | 1.28 ×10 <sup>-07</sup> | FALSE               |
| 95   | 3.06 ×10 <sup>-08</sup> | chr4:23366403-23443403    | rs215411   | 4   | 23423603  | 6.25 ×10 <sup>-08</sup> | FALSE               |
| 96   | 3.15 ×10 <sup>-08</sup> | chr5:153671057-153688217  | rs6864084  | 5   | 153685526 | 1.27 ×10 <sup>-07</sup> | FALSE               |
| 97   | 3.70 ×10 <sup>-08</sup> | chr11:109285471-109610071 | rs3858402  | 11  | 109555838 | 1.08 ×10 <sup>-07</sup> | FALSE               |
| 98   | 3.71 ×10 <sup>-08</sup> | chr7:110034393-110106693  | rs9656169  | 7   | 110074276 | 7.86 ×10 <sup>-07</sup> | FALSE               |
| 99   | 3.91 ×10 <sup>-08</sup> | chr12:29905265-29940365   | rs679087   | 12  | 29917265  | 3.88 ×10 <sup>-08</sup> | TRUE                |
| 100  | 4.42 ×10 <sup>-08</sup> | chr7:131539263-131567263  | rs7801375  | 7   | 131567263 | 5.82 ×10 <sup>-08</sup> | FALSE               |
| 101  | 4.45 ×10 <sup>-08</sup> | chr1:177247821-177300821  | rs16851048 | 1   | 177276006 | 1.88 ×10 <sup>-07</sup> | FALSE               |
| 102  | 4.47 ×10 <sup>-08</sup> | chr1:207912183-208024083  | rs7523273  | 1   | 207977083 | 6.91 ×10 <sup>-08</sup> | FALSE               |
| 103  | 4.56 ×10 <sup>-08</sup> | chr20:48114136-48131649   | rs6019879  | 20  | 48130628  | 1.05 ×10 <sup>-07</sup> | FALSE               |
| 104  | 4.59 ×10 <sup>-08</sup> | chr12:92243186-92258286   | NA         | NA  | NA        | NA                      | NA                  |
| 105  | 4.62 ×10 <sup>-08</sup> | chr2:162798555-162910255  | rs2909457  | 2   | 162845855 | 1.11 ×10 <sup>-07</sup> | FALSE               |
| 106  | 4.69 ×10 <sup>-08</sup> | chr19:50067499-50135399   | rs56873913 | 19  | 50091199  | 4.34 ×10 <sup>-07</sup> | FALSE               |
| 107  | 4.84 ×10 <sup>-08</sup> | chr12:103559855-103616655 | rs10860965 | 12  | 103605337 | 4.60 ×10 <sup>-06</sup> | FALSE               |
| 108  | 4.85 ×10 <sup>-08</sup> | chr5:140023664-140222664  | rs13168670 | 5   | 140146899 | 6.25 ×10 <sup>-08</sup> | FALSE               |

RANK: PGC2 risk loci ranked according to their significance; *P*-value: PGC2 *P* values; SNP ID: SNP with most significant *P* value in the PGC region; Chr: Chromosome; BP: Base pair (hg19); Meta *P* value: Trans-ethnic meta-analysis *P*-values; is more significant: True if Meta-analysis *P* value is more significant than PGC *P* value; NA in some of the rows indicate that meta-analysis results did not have any SNPs in those regions.

**eTable 9. Risk Profile Scoring–Sign Test  $P$ -values for SNPs ( $P_T < .05$ ) Sharing the Same Direction of Effects**

| MAF (CEU) | Total SNPs | Homogeneity | Sign Test $P$ Value    |
|-----------|------------|-------------|------------------------|
| <0.1      | 2640       | 1383        | 0.007483               |
| 0.1-0.2   | 3052       | 1601        | 0.003493               |
| 0.2-0.3   | 2623       | 1406        | 0.0001202              |
| 0.3-0.4   | 2465       | 1341        | $6.71 \times 10^{-6}$  |
| 0.4-0.5   | 2183       | 1201        | $1.51 \times 10^{-6}$  |
| All       | 12963      | 6932        | $1.31 \times 10^{-15}$ |

The table shows the total number of SNPs, the SNPs sharing the same direction of effects, and their respective sign test for all the SNPs included below the  $P$  value threshold ( $P_T = 0.05$ ) and MAF ranges <0.1, 0.1-0.2, 0.2-0.3, 0.3-0.4, 0.4-0.5. For all SNPs below  $P_T = 0.05$ , there was an excess of same-direction effects between PGC2 and Indian studies (53.48%, binomial  $P = 1.31 \times 10^{-15}$ ).

**eTable 10. BRAINEAC *cis*-eQTL Results for the Top SNP and Genes in Indian Top Locus (100-Kb Window)**

| <b>Gene</b>   | <b>Gene Position (hg19)</b> | <b>SNP ID</b> | <b>SNP Position</b> | <b>Brain eQTL <i>P</i> Value</b> |
|---------------|-----------------------------|---------------|---------------------|----------------------------------|
| <i>NAPRT1</i> | chr8:144656958-144660799    | rs10866912    | chr8:144655315      | $2.90 \times 10^{-13}$           |
| <i>ZC3H3</i>  | chr8:144519831-144623975    | rs10866912    | chr8:144655315      | $3.0 \times 10^{-04}$            |
| <i>EEF1D</i>  | chr8:144660506-144665462    | rs10866912    | chr8:144655315      | $5.10 \times 10^{-03}$           |
| <i>TIGD5</i>  | chr8:144680015-144683133    | rs10866912    | chr8:144655315      | $2.00 \times 10^{-02}$           |
| <i>GSDMD</i>  | chr8:144635868-144645225    | rs10866912    | chr8:144655315      | $2.40 \times 10^{-02}$           |
| <i>MROH6</i>  | chr8:144648365-144655121    | rs10866912    | chr8:144655315      | $2.70 \times 10^{-02}$           |
| <i>PYCRL</i>  | chr8:144686083-144691764    | rs10866912    | chr8:144655315      | $5.40 \times 10^{-02}$           |
| <i>TSTA3</i>  | chr8:144694794-144718237    | rs10866912    | chr8:144655315      | $7.20 \times 10^{-02}$           |
| <i>ZNF623</i> | chr8:144718104-144738583    | rs10866912    | chr8:144655315      | $9.00 \times 10^{-02}$           |

**eTable 11. SMR Results Using the Brain-eMeta eQTL Data Set for Our Top SNP, rs10866912**

| Gene          | topSNP     | SNP_Pos     | $P_{GWAS}$            | $P_{eQTL}$             | b_SMR     | se_SMR    | $P_{SMR}$             | $P_{SMR\_multi}$      | $P_{HEIDI}$            |
|---------------|------------|-------------|-----------------------|------------------------|-----------|-----------|-----------------------|-----------------------|------------------------|
| <i>GSDMD</i>  | rs10866912 | 8:144655315 | $4.35 \times 10^{-8}$ | $8.69 \times 10^{-10}$ | 0.237438  | 0.0598935 | $7.36 \times 10^{-5}$ | $2.26 \times 10^{-3}$ | $9.68 \times 10^{-5}$  |
| RP11-661A12.9 | rs10866912 | 8:144655315 | $4.35 \times 10^{-8}$ | $1.81 \times 10^{-12}$ | 0.0830525 | 0.0198564 | $2.88 \times 10^{-5}$ | $3.65 \times 10^{-3}$ | $2.06 \times 10^{-5}$  |
| <i>NAPRT1</i> | rs10866912 | 8:144655315 | $4.35 \times 10^{-8}$ | 0.00E+00               | 0.055346  | 0.0107506 | $2.63 \times 10^{-7}$ | $2.96 \times 10^{-3}$ | $3.4 \times 10^{-5}$   |
| <i>TIGD5</i>  | rs10866912 | 8:144655315 | $4.35 \times 10^{-8}$ | $8.89 \times 10^{-16}$ | 0.119777  | 0.0274438 | $1.27 \times 10^{-5}$ | $2.85 \times 10^{-4}$ | $3.61 \times 10^{-11}$ |

*P*: *P*-value;  $P_{GWAS}$ : the *P*-value for top SNP in the Indian GWAS;  $P_{eQTL}$ : Brain-eMeta eQTL *P*-value for top SNP; b\_SMR: Beta value for SMR association; se\_SMR: Standard Error for SMR association;  $P_{SMR}$ : *P*-value for SMR association;  $P_{SMR\_multi}$ : *P*-value for SMR multi association  $P_{HEIDI}$ : *P*-value for HEIDI test

**eTable 12. Indian Replication Results for PGC2 Top Loci (96/108)**

| PGC2 Top Regions (hg19) | Indian Top SNP | Chr | BP (hg19) | Z-Score | P Value  |
|-------------------------|----------------|-----|-----------|---------|----------|
| 6_28684183_28729994     | rs5875167      | 6   | 28703608  | 1.403   | 0.1607   |
| 1_98491248_98512127     | rs11404556     | 1   | 98494388  | -1.829  | 0.06736  |
| 10_104612335_104628873  | 10-104619327   | 10  | 104619327 | 2.023   | 0.04304  |
| 12_2344960_2344960      | 12-2344960     | 12  | 2344960   | -1.535  | 0.1248   |
| 8_143312933_143316970   | rs67498679     | 8   | 143316849 | -0.232  | 0.8167   |
| 7_2017445_2048220       | rs3996329      | 7   | 2018870   | 1.326   | 0.1848   |
| 5_60589739_60614879     | rs113807000    | 5   | 60600123  | -2.109  | 0.03491  |
| 12_123665113_123746961  | 12-123725688   | 12  | 123725688 | -2.1    | 0.03575  |
| 15_91426560_91426560    | rs4702         | 15  | 91426560  | 0.744   | 0.457    |
| 3_36858583_36858583     | rs75968099     | 3   | 36858583  | 2.316   | 0.02056  |
| 14_104021141_104053764  | rs12889403     | 14  | 104034746 | -2.094  | 0.03627  |
| 15_78883813_78912943    | rs62010330     | 15  | 78905854  | 0.67    | 0.5031   |
| 7_110851553_110957151   | rs37752        | 7   | 110921994 | -1.085  | 0.2778   |
| 11_130717153_130729430  | rs61435928     | 11  | 130719075 | 1.873   | 0.061    |
| 2_185601420_185663304   | rs10172501     | 2   | 185630341 | 2.808   | 0.004987 |
| 10_18734528_18751891    | rs10764512     | 10  | 18745202  | -2.603  | 0.009238 |
| 1_73766431_73884838     | rs1923232      | 1   | 73853042  | -1.387  | 0.1655   |
| 2_233592501_233707889   | rs112967383    | 2   | 233606144 | 1.292   | 0.1964   |
| 11_124612932_124613957  | rs12293670     | 11  | 124612932 | 0.387   | 0.699    |
| 18_53200117_53200117    | rs9636107      | 18  | 53200117  | 1.964   | 0.0495   |
| 11_46350213_46350213    | rs61126341     | 11  | 46350213  | -0.43   | 0.6673   |
| 3_180592360_180700150   | rs11411529     | 3   | 180594593 | -2.142  | 0.03219  |
| 20_37422829_37457184    | rs10645870     | 20  | 37450625  | -2.392  | 0.01673  |
| 2_57961602_57998040     | rs72804548     | 2   | 57974646  | 1.608   | 0.1079   |
| 15_84703470_84706461    | rs950169       | 15  | 84706461  | -0.803  | 0.4217   |
| 18_53533189_53568458    | 18-53558587    | 18  | 53558587  | -1.677  | 0.0936   |
| 2_198248128_198304577   | 2-198295828    | 2   | 198295828 | -1.86   | 0.06284  |
| 22_41587556_41587556    | rs9607782      | 22  | 41587556  | 2.318   | 0.02046  |
| 8_111471166_111511043   | rs143086783    | 8   | 111508076 | 1.891   | 0.05861  |
| 3_2547786_2554612       | rs749613       | 3   | 2552565   | -0.906  | 0.365    |
| 11_113317745_113392994  | rs77655590     | 11  | 113337446 | -2.231  | 0.02568  |
| 11_133822569_133830067  | rs694424       | 11  | 133824539 | 1.297   | 0.1948   |
| 3_52833805_52847601     | rs146326248    | 3   | 52837282  | 0.808   | 0.4191   |
| 16_29924422_29978827    | rs11150575     | 16  | 29935066  | 1.3     | 0.1934   |
| 3_136165695_136425514   | 3-136352543    | 3   | 136352543 | 1.748   | 0.08049  |
| 5_152162776_152177121   | rs4616882      | 5   | 152173139 | 3.068   | 0.002155 |
| 17_2207236_2209888      | rs57130114     | 17  | 2209002   | 2.138   | 0.03255  |
| 7_86420126_86427626     | rs13230421     | 7   | 86420126  | -2.072  | 0.03826  |
| 15_61831680_61879179    | 15-61872804    | 15  | 61872804  | 1.437   | 0.1507   |
| 1_44078384_44107428     | rs603542       | 1   | 44079411  | 2.873   | 0.004062 |
| 19_19478022_19484295    | rs2905426      | 19  | 19478022  | -2.011  | 0.0443   |
| 1_149999059_150134221   | rs12022725     | 1   | 150000165 | 1.684   | 0.09211  |
| 1_2383039_2402499       | rs4648845      | 1   | 2387101   | -1.841  | 0.06555  |
| 16_13746548_13761333    | rs34646006     | 16  | 13758253  | 1.326   | 0.185    |
| 7_104812129_105031108   | rs13226540     | 7   | 104999901 | 2.348   | 0.01889  |
| 1_8421203_8424984       | rs13596        | 1   | 8421203   | 2.836   | 0.004575 |
| 12_110723245_110723245  | 12-110723245   | 12  | 110723245 | 1.527   | 0.1267   |
| 4_170551373_170646003   | rs6834147      | 4   | 170563153 | 1.204   | 0.2286   |
| 22_42603814_42603814    | rs6002655      | 22  | 42603814  | 0.744   | 0.4572   |
| 2_146419047_146440672   | rs6430095      | 2   | 146439945 | 1.759   | 0.0786   |
| 11_57409795_57644334    | rs515939       | 11  | 57432629  | -1.285  | 0.1989   |
| 11_24384697_24410865    | rs142359455    | 11  | 24406704  | -1.31   | 0.19     |
| 1_30428943_30437268     | rs34418819     | 1   | 30432824  | 1.322   | 0.1862   |
| 7_137048159_137085250   | rs1731947      | 7   | 137081525 | -1.476  | 0.14     |

| PGC2 Top Regions (hg19) | Indian Top SNP | Chr | BP (hg19) | Z-Score | P Value   |
|-------------------------|----------------|-----|-----------|---------|-----------|
| 9_84736303_84744273     | rs6559650      | 9   | 84741407  | 0.985   | 0.3245    |
| 15_40566759_40569884    | rs4924443      | 15  | 40567367  | 2.023   | 0.04307   |
| 19_30987423_30987423    | rs2053079      | 19  | 30987423  | -1.21   | 0.2264    |
| 5_88744550_88746331     | rs1820170      | 5   | 88746203  | -1.824  | 0.06811   |
| 3_17849789_17886678     | rs2033379      | 3   | 17851238  | -1.839  | 0.06591   |
| 5_137851192_137948140   | rs1864980      | 5   | 137947101 | -2.439  | 0.01472   |
| 14_99719219_99719219    | rs2693698      | 14  | 99719219  | 1.048   | 0.2949    |
| 14_72417326_72417326    | rs2332700      | 14  | 72417326  | 0.74    | 0.4594    |
| 5_45298611_45393754     | rs10064595     | 5   | 45332612  | -1.066  | 0.2862    |
| 8_60691526_60750473     | rs34979222     | 8   | 60723658  | 1.533   | 0.1253    |
| 2_200162425_200164252   | rs7605371      | 2   | 200162766 | 1.017   | 0.3091    |
| 2_193848340_193848340   | rs59979824     | 2   | 193848340 | -3.378  | 0.0007298 |
| 4_176861301_176866459   | rs1106568      | 4   | 176861301 | -0.859  | 0.3906    |
| 8_4178791_4183057       | rs17069921     | 8   | 4182101   | 1.258   | 0.2085    |
| 2_225334070_225467840   | rs72617131     | 2   | 225419922 | 1.728   | 0.08393   |
| 8_89535302_89601210     | rs117535734    | 8   | 89552192  | -2.105  | 0.03528   |
| 16_9937980_9959121      | rs6497549      | 16  | 9950374   | -1.791  | 0.07324   |
| 14_30190316_30190316    | rs2068012      | 14  | 30190316  | 1.035   | 0.3008    |
| 3_63792668_63903759     | rs10715557     | 3   | 63847469  | -1.484  | 0.1378    |
| 16_68061171_68293320    | rs77884900     | 16  | 68190239  | 2.223   | 0.02624   |
| 2_149049630_149873154   | rs71406028     | 2   | 149458259 | 2.897   | 0.003762  |
| 17_17883848_17972973    | rs2955368      | 17  | 17961349  | 0.294   | 0.7689    |
| 15_70573896_70595477    | rs11306388     | 15  | 70580499  | -2.254  | 0.02421   |
| 16_58669908_58682833    | rs12325245     | 16  | 58681393  | -1.569  | 0.1167    |
| 8_27412605_27442127     | rs2741348      | 8   | 27420782  | 1.34    | 0.1801    |
| 6_73154800_73157926     | rs4147060      | 6   | 73156139  | -1.278  | 0.2013    |
| 7_24747494_24798639     | rs2521769      | 7   | 24784485  | -2.119  | 0.03409   |
| 5_109030041_109141527   | rs3753174      | 5   | 109107937 | 1.052   | 0.2927    |
| 4_23423586_23423603     | rs215411       | 4   | 23423603  | -0.639  | 0.5229    |
| 5_153675891_153686366   | 5-153677362    | 5   | 153677362 | -0.855  | 0.3927    |
| 11_109378071_109392839  | rs79307239     | 11  | 109386518 | -1.004  | 0.3152    |
| 7_110039196_110072128   | rs67820402     | 7   | 110058388 | -1.446  | 0.1483    |
| 12_29916839_29928388    | 12-29918582    | 12  | 29918582  | -2.083  | 0.03724   |
| 7_131567263_131567263   | rs7801375      | 7   | 131567263 | 1.198   | 0.2311    |
| 1_177280121_177300809   | rs3066140      | 1   | 177288341 | 1.974   | 0.04836   |
| 1_207977083_207977083   | rs7523273      | 1   | 207977083 | 1.28    | 0.2007    |
| 20_48114678_48131649    | rs1393343      | 20  | 48115247  | -1.456  | 0.1454    |
| 12_92246786_92257509    | 12-92252781    | 12  | 92252781  | -1.512  | 0.1304    |
| 2_162802184_162845855   | rs146357347    | 2   | 162809963 | 1.873   | 0.06107   |
| 19_50067508_50103252    | rs5023763      | 19  | 50072067  | 1.988   | 0.04678   |
| 12_103561799_103608071  | 12-103563372   | 12  | 103563372 | -0.625  | 0.5319    |
| 5_140136468_140221139   | rs3806843      | 5   | 140212538 | 2.51    | 0.01206   |

Chr: Chromosome; BP: Base pair (hg19)

## eReferences

1. Thara R, Srinivasan T, John S, et al. Design and Clinical Characteristics of a Homogeneous Schizophrenia Pedigree Sample from Tamil Nadu, India. *Aust N Z J Psychiatry*. 2009;43(6):561-570.
2. Holliday EG, Nyholt DR, Tirupati S, et al. Strong evidence for a novel schizophrenia risk locus on chromosome 1p31.1 in homogeneous pedigrees from Tamil Nadu, India. *Am J Psychiatry*. 2009;166(2):206-215.
3. Yang J, Lee SH, Goddard ME, Visscher PM. GCTA: a tool for genome-wide complex trait analysis. *Am J Hum Genet*. 2011;88(1):76-82.
4. Lee SH, DeCandia TR, Ripke S, et al. Estimating the proportion of variation in susceptibility to schizophrenia captured by common SNPs. *Nat Genet*. 2012;44(3):247-250.
5. Conomos MP, Reiner AP, Weir BS, Thornton TA. Model-free Estimation of Recent Genetic Relatedness. *Am J Hum Genet*. 2016;98(1):127-148.
6. Willer CJ, Li Y, Abecasis GR. METAL: fast and efficient meta-analysis of genomewide association scans. *Bioinformatics*. 2010;26(17):2190-2191.
7. Gao F, Chang D, Biddanda A, et al. XWAS: A Software Toolset for Genetic Data Analysis and Association Studies of the X Chromosome. *Journal of Heredity*. 2015;106(5):666-671.
8. Schork AJ, Won H, Appadurai V, et al. A genome-wide association study of shared risk across psychiatric disorders implicates gene regulation during fetal neurodevelopment. *Nat Neurosci*. 2019;22(3):353-361.
9. Purcell SM, Wray NR, Stone JL, et al. Common polygenic variation contributes to risk of schizophrenia and bipolar disorder. *Nature*. 2009;460(7256):748-752.
10. Wray NR, Yang J, Hayes BJ, Price AL, Goddard ME, Visscher PM. Pitfalls of predicting complex traits from SNPs. *Nat Rev Genet*. 2013;14(7):507-515.
11. Euesden J, Lewis CM, O'Reilly PF. PRSice: Polygenic Risk Score software. *Bioinformatics*. 2015;31(9):1466-1468.
12. Falconer DS. The inheritance of liability to diseases with variable age of onset, with particular reference to diabetes mellitus. *Ann Hum Genet*. 1967;31(1):1-20.
13. Kichaev G, Roytman M, Johnson R, et al. Improved methods for multi-trait fine mapping of pleiotropic risk loci. *Bioinformatics*. 2017;33(2):248-255.
14. Kichaev G, Yang WY, Lindstrom S, et al. Integrating functional data to prioritize causal variants in statistical fine-mapping studies. *PLoS genetics*. 2014;10(10):e1004722.
15. Marcus JH, Novembre J. Visualizing the geography of genetic variants. *Bioinformatics*. 2017;33(4):594-595.
16. Lloyd-Jones LR, Robinson MR, Yang J, Visscher PM. Transformation of Summary Statistics from Linear Mixed Model Association on All-or-None Traits to Odds Ratio. *Genetics*. 2018;208(4):1397-1408.
17. Trabzuni D, Ryten M, Walker R, et al. Quality control parameters on a large dataset of regionally dissected human control brains for whole genome expression studies. *J Neurochem*. 2011;119(2):275-282.
18. GTEx Consortium. The Genotype-Tissue Expression (GTEx) project. *Nat Genet*. 2013;45(6):580-585.



19. Fromer M, Roussos P, Sieberts SK, et al. Gene expression elucidates functional impact of polygenic risk for schizophrenia. *Nat Neurosci*. 2016;19(11):1442-1453.
20. Kang HJ, Kawasawa YI, Cheng F, et al. Spatio-temporal transcriptome of the human brain. *Nature*. 2011;478(7370):483-489.
21. Brown BC, Asian Genetic Epidemiology Network Type 2 Diabetes C, Ye CJ, Price AL, Zaitlen N. Transethnic Genetic-Correlation Estimates from Summary Statistics. *Am J Hum Genet*. 2016;99(1):76-88.
22. Zhu Z, Zhang F, Hu H, et al. Integration of summary data from GWAS and eQTL studies predicts complex trait gene targets. *Nat Genet*. 2016;48(5):481-487.
23. Qi T, Wu Y, Zeng J, et al. Identifying gene targets for brain-related traits using transcriptomic and methylomic data from blood. *Nat Commun*. 2018;9(1):2282.
24. de Leeuw CA, Mooij JM, Heskes T, Posthuma D. MAGMA: Generalized Gene-Set Analysis of GWAS Data. *PLOS Computational Biology*. 2015;11(4):e1004219.
25. Marbach D, Lamparter D, Quon G, Kellis M, Kutalik Z, Bergmann S. Tissue-specific regulatory circuits reveal variable modular perturbations across complex diseases. *Nat Meth*. 2016;13(4):366-370.
26. Giacomotto J, Rinkwitz S, Becker TS. Effective heritable gene knockdown in zebrafish using synthetic microRNAs. *Nat Commun*. 2015;6:7378.
27. Laird AS, Mackovski N, Rinkwitz S, Becker TS, Giacomotto J. Tissue-specific models of spinal muscular atrophy confirm a critical role of SMN in motor neurons from embryonic to adult stages. *Hum Mol Genet*. 2016;25(9):1728-1738.
28. Machiela MJ, Chanock SJ. LDassoc: an online tool for interactively exploring genome-wide association study results and prioritizing variants for functional investigation. *Bioinformatics*. 2017.
29. Sommer S. The importance of immune gene variability (MHC) in evolutionary ecology and conservation. *Front Zool*. 2005;2:16.
30. Murray RM, Bhavsar V, Tripoli G, Howes O. 30 Years on: How the Neurodevelopmental Hypothesis of Schizophrenia Morphed Into the Developmental Risk Factor Model of Psychosis. *Schizophr Bull*. 2017;43(6):1190-1196.
